1 **Microbial community structure and microbial networks correspond**  
2 **to nutrient gradients within coastal wetlands of the Laurentian**  
3 **Great Lakes.**

4  
5 **Dean J. Horton<sup>1</sup>, Kevin R. Theis<sup>2</sup>, Donald G. Uzarski<sup>1</sup>, and Deric R. Learman<sup>1\*</sup>**

6  
7 <sup>1</sup>Institute for Great Lakes Research, CMU Biological Station, and Department of Biology,  
8 Central Michigan University, Mt. Pleasant, MI, U.S.A.

9 <sup>2</sup>Department of Microbiology, Immunology, and Biochemistry, Wayne State University, Detroit,  
10 MI, U.S.A

11  
12 **\*Correspondence:**

13 Deric R. Learman

14 [deric.learman@cmich.edu](mailto:deric.learman@cmich.edu)

15  
16 **Keywords:** microbial ecology, wetland soil ecology, Laurentian Great Lakes, Network analysis,  
17 16S rRNA gene sequencing, biogeochemistry

18  
19  
20  
21  
22  
23  
24  
25  
26  
27  
28  
29  
30  
31  
32  
33  
34  
35  
36  
37  
38  
39  
40  
41  
42  
43  
44  
45  
46

## 47 **ABSTRACT**

48  
49 Microbial communities within the soil of Laurentian Great Lakes coastal wetlands drive  
50 biogeochemical cycles and provide several other ecosystems services. However, there exists a  
51 lack of understanding of how microbial communities respond to nutrient gradients and human  
52 activity in these systems. This research sought to address the lack of understanding through  
53 exploration of relationships between nutrient gradients, microbial community diversity, and  
54 microbial networks. Significant differences in microbial community structure were found among  
55 coastal wetlands within the western basin of Lake Erie and all other wetlands studied (three  
56 regions within Saginaw Bay and one region in the Beaver Archipelago). These diversity  
57 differences coincided with higher nutrient levels within the Lake Erie region. Site-to-site  
58 variability also existed within the majority of the regions studied, suggesting site-scale  
59 heterogeneity may impact microbial community structure. Several subnetworks of microbial  
60 communities and individual community members were related to chemical gradients among  
61 wetland regions, revealing several candidate indicator communities and taxa which may be  
62 useful for Great Lakes coastal wetland management. This research provides an initial  
63 characterization of microbial communities among Great Lakes coastal wetlands and  
64 demonstrates that microbial communities could be negatively impacted by anthropogenic  
65 activities.

66

## 67 **INTRODUCTION**

68  
69 The Laurentian Great Lakes of North America are one of the largest freshwater systems  
70 on Earth, and are critical in supporting biogeochemical cycles, freshwater resources,  
71 biodiversity, and economic viability of the surrounding region. Notably, the Great Lakes region  
72 has been impacted by anthropogenic pressure, with cumulative stress having a particular impact  
73 on the western basin of Lake Erie (Danz *et al.*, 2007; Uzarski *et al.*, 2017). These negative  
74 impacts extend to ecological transition zones between upland and aquatic environments in the  
75 form of coastal wetlands which border the Great Lakes (Uzarski, 2009). Agricultural runoff,  
76 atmospheric deposition, and urbanization influence water chemistry, and thereby reduce water  
77 quality and impair these coastal wetlands (Trebitz *et al.*, 2007; Morrice *et al.*, 2008). As  
78 consequence, research assessing biodiversity and anthropogenic pressure on coastal wetlands of  
79 the Great Lakes has surged since the Great Lakes Water Quality Agreement (GLWQA) was  
80 established in 1972 (Hackett *et al.*, 2017). While much research on coastal wetlands has  
81 flourished in the wake of this international agreement, microbial communities within Great  
82 Lakes coastal wetlands remain almost entirely uncharacterized (Hackett *et al.*, 2017). The few  
83 research studies on microbial communities in Great Lakes coastal wetlands have focused on the  
84 use of microbial enzymatic assays as a tool to explore decomposition rates and nutrient limitation  
85 (Jackson *et al.*, 1995; Hill *et al.*, 2006). Community diversity, structure, and taxonomic  
86 composition have been largely overlooked. As the microbial communities within Great Lakes  
87 coastal wetlands have yet to be fundamentally described, it is important to gather baseline data  
88 on what microbes exist within these systems, to elucidate how these microbes could be  
89 interacting, and to determine to what extent microbial diversity may already be impacted by  
90 anthropogenic chemical disturbance.

91

92 Microbial communities contribute substantially to the ecological functioning of coastal  
93 wetlands (such as carbon and greenhouse gas cycling, and redox-mediated chemical processes),  
94 and these wetlands are vital in the retention of chemical pollutants (e.g., heavy metals),  
95 sediments, and excess nutrients (e.g., N and P). Coastal wetlands mitigate the effects of these  
96 pollutants and reduce pollution impacts on the Great Lakes themselves (Wang & Mitsch, 1998;  
97 Sierszen *et al.*, 2012). Coastal wetlands border much of the Great Lakes coastline, where they  
98 make up nearly 200,000 ha of habitat between the United States and Canada, despite reduction of  
99 this habitat by approximately 50% since European colonization (Dahl, 1990; Hecnar, 2004;  
100 Sierszen *et al.*, 2012). Further, the economy of the Great Lakes is contingent on the existence and  
101 proper functioning of coastal wetlands. In providing ecosystem services and promoting  
102 biodiversity, these wetlands have an estimated annual worth of \$69 billion USD; the value of  
103 recreational fishing alone is valued at \$7.4 billion USD per year (Krantzberg & de Boer, 2008;  
104 Campbell *et al.*, 2015). As such, negative anthropogenic impacts on microbial communities  
105 could influence the economic viability of the Great Lakes region, biodiversity retention, and the  
106 functioning of critical elemental cycles which commonly occur within freshwater wetlands.

107  
108 Most notably, carbon mineralization occurs within wetland soils via redox processes  
109 mediated by microbial communities, and these processes contribute to pollution mitigation and  
110 atmospheric greenhouse gas flux (Conrad, 1996; Reddy & DeLaune, 2008). Wetland soils often  
111 become chemically structured with increasing depth through sequential reduction of electron  
112 acceptors that decrease in metabolic favorability to microbes due to thermodynamic constraints  
113 (Conrad, 1996; Reddy & DeLaune, 2008; Kögel-Knabner *et al.*, 2010). As microbial community  
114 metabolism changes in concert with soil chemical profiles, microbial community compositional  
115 shifts commonly reflect functional changes of the community (Lüdemann *et al.*, 2000; Edlund *et al.*,  
116 2008; Lipson *et al.*, 2015). However, while availability of electron acceptors may influence  
117 chemical and biological structure within wetland soils, concentration of carbon electron donors  
118 can influence the vertical stratification of redox processes (Achnich *et al.*, 1995; Alewell *et al.*,  
119 2008), and by extension, vertical microbial community structure (defined as relative proportions  
120 of microbial taxa within a community). As an example of how this may apply to natural  
121 environments, increased carbon and nutrient influx from anthropogenic activities (such as  
122 agricultural pressure) may impact microbial community structure within coastal wetlands.  
123 Impacts to microbial community composition may extend to shifts in chemical cycles and redox  
124 processes as consequence, as disturbance to microbial community structure can often lead to a  
125 shift in community function (Shade *et al.*, 2012). However, while community structure may be  
126 indicative of environmental gradients within wetlands, taxonomic identification of microbes  
127 which respond to human pressures is necessary to appreciate which fraction of wetland microbial  
128 communities are most sensitive to environmental disturbances.

129  
130 Networks of microbial taxa exist within microbial communities, and impacts to  
131 individual members could affect entire networks (Faust & Raes, 2012). Thus, it is important  
132 explore hypothetical microbial networks within natural environments, and their relationships to  
133 changing environmental conditions. Understanding how microbial networks respond to  
134 physicochemical shifts could aid in predicting how a future change in environmental conditions  
135 (perhaps caused by anthropogenic activity) may impact local microbial communities. Further,  
136 identifying microbial taxonomic and diversity responses to environmental stressors caused by  
137 human activity is the first step in developing biological indicators that can predict levels of

138 anthropogenic stress on natural environments, such as wetlands. Physicochemical and biological  
139 indicators have been continuously developed to determine which biological taxa are most  
140 sensitive to anthropogenic pressures within freshwater wetlands, and by extension, how these  
141 biological responses can inform scientists and managers about the health of coastal wetlands  
142 along the Great Lakes (Uzarski *et al.*, 2017). These indices have been established for physical  
143 and chemical attributes (such as nutrient levels, urbanization, land use, etc.), as well as several  
144 eukaryotic taxonomic groups (e.g., macrophytes, macroinvertebrates, fish, anurans, and birds)  
145 (Uzarski *et al.*, 2017). However, as different taxonomic indicators highlight unique pressures on  
146 wetland systems, indicators based on different biological groups can often conflict in their  
147 assessment of wetland ecosystem health. As such, it is necessary to examine a wide range of  
148 biological indicators to assess different aspects of wetland ecosystem health. A biological index  
149 for bacteria and archaea has yet to be developed for responses to human impacts within  
150 freshwater coastal wetlands (Uzarski *et al.*, 2017). A first step in establishing a microbial index is  
151 to uncover specific networks of microbial taxa (Sims *et al.*, 2013; Urakawa & Bernhard, 2017)  
152 and diversity patterns found to be related to environmental gradients linked to anthropogenic  
153 activity (e.g., soil nutrient levels) among Great Lakes coastal wetlands.

154  
155 This study sought to provide an initial characterization of microbial communities within  
156 soils of Great Lakes coastal wetlands bordering the western basin of Lake Erie, Saginaw Bay of  
157 Lake Huron, and northern Lake Michigan. Wetland sites explored in this study have been  
158 extensively researched over multiple years and vary widely in the degree to which they are  
159 impacted by human activity (Uzarski *et al.*, 2017). This study explored how environmental  
160 gradients among these coastal wetlands were related to microbial community structure among  
161 wetlands. Additionally, relationships among microbial communities and changing environmental  
162 conditions with increasing soil depth were also explored within each wetland site. It was  
163 predicted that microbial community structure would be related to environmental gradients among  
164 and within coastal wetland regions of the Great Lakes, and elevated nutrient levels within  
165 wetlands would decouple the relationship between microbial community structure and soil depth  
166 with respect to coastal wetlands lower in nutrient levels, as has been suggested in previous  
167 studies (Achnich *et al.*, 1995; Alewell *et al.*, 2008). Through high-throughput sequencing of the  
168 16S rRNA gene and microbial network analyses, variations in key microbial taxa and  
169 subcommunities related to environmental gradients established by wetlands were identified.

170

## 171 **MATERIALS AND METHODS**

172

### 173 **Study site and field sampling**

174

175 In the summer of 2014, wetland soil cores were collected within Laurentian Great Lakes  
176 coastal wetland ecosystems. Specifically, soil cores were collected from ten sites across five  
177 regions, including two sites in the western basin of Lake Erie (LE), three sites in eastern Saginaw  
178 Bay (ESBT), two sites in northern Saginaw Bay (NSB), two sites in western Saginaw Bay  
179 (WSB) in Lake Huron, and one site in the Beaver Island archipelago (BA) in Lake Michigan  
180 (Fig. 1). These sites were selected as they corresponded to environmental gradients, as well as  
181 human impact gradients based upon SumRank scores (an index assessing land use and water  
182 quality) as described in Uzarski *et al.* (2017) (Supplemental Fig. 1). Soil cores were collected by  
183 hand-driving plastic core tubes (~ 5 cm diameter) vertically into the soil. Among wetlands,

184 samples were collected within the same vegetation zone across sites (either dominated by  
185 cattails, genus *Typhus*, or bulrush, genus *Shoenoplectus*) as an attempt to control for collection  
186 bias, as different vegetation zones can harbor microbial communities distinct from other  
187 vegetation zones (Tang *et al.*, 2011). Cores were sampled to a depth of at least 6 cm (except for  
188 one core which was sampled to a depth of 4 cm) and were immediately flash frozen in a dry ice  
189 ethanol bath. Samples were transported on dry ice to Central Michigan University wherein they  
190 were stored at -80 °C.

191  
192 Triplicate cores were taken at five wetland sites while duplicate cores were taken at five  
193 other wetland sites. Global Positioning System (GPS) coordinates were recorded at each  
194 sampling location. For sample extraction and sectioning, cores were extruded while still frozen  
195 via a custom-built core extruder. The edge of the core was warmed with a heat gun to allow the  
196 soil core to pass efficiently through the plastic container, however, the inner-core did not thaw  
197 during extrusion. Ice was applied to the plastic core liner to prevent accelerated thawing.  
198 Beginning from the top surface of soil, 2 cm sections were cut via an ethanol and flame-sterilized  
199 hacksaw blade and the sectioned core samples were placed into Whirl-Pak bags and stored at -80  
200 °C. The extruder face plate was sterilized between cuts of the same core with ethanol. The  
201 extruder device was fully cleaned and sterilized between cores with physical scrubbing and  
202 ethanol sterilization.

203

## 204 **Microbial community analysis**

205

206 Each soil sample was analyzed independently for microbial community analyses. DNA  
207 was extracted from ~ 0.25 g of soil using a MoBio PowerSoil DNA Isolation Kit (Mo Bio,  
208 Carlsbad, CA) following the standard manufacturer's protocol. Concentrations of extracted DNA  
209 were assessed using a Qubit<sup>®</sup> 2.0 fluorometer (Life Technologies, Carlsbad, CA) to ensure  
210 successful DNA extraction and quantification for sequence library preparation. DNA samples  
211 were sent to Michigan State University (East Lansing, MI) for library preparation and sequence  
212 analysis at the Research Technology Support Facility. The V4 region of the 16S rRNA gene was  
213 amplified for downstream sequencing with the commonly used primers 16Sf-V4 (515f) and  
214 16Sr-V4 (806r) and a previously developed protocol (Caporaso *et al.*, 2012; Kozich *et al.*, 2013).  
215 Paired-end 250 bp sequencing was accomplished via a MiSeq high-throughput sequencer  
216 (Illumina, San Diego, CA). Acquired DNA sequences were filtered for quality and analyzed  
217 using MOTHUR v 1.35.1 (Schloss *et al.*, 2009) following the MiSeq SOP (available at  
218 <https://www.mothur.org/>) with modifications. Scripts used for sequence processing can be found  
219 at the GitHub repository associated with this study (<https://github.com/horto2dj/GLCW/>).  
220 Briefly, paired end sequences were combined into single contigs. Sequences that contained  
221 homopolymers > 8 bases, and those less than 251 or greater than 254 bp were removed.  
222 Sequences were aligned against the Silva (v 119) rRNA gene reference database (Quast *et al.*,  
223 2012). Sequences which did not align with the V4 region were also subsequently removed from  
224 analysis. Chimeric DNA was searched for and removed via UCHIME (Edgar *et al.*, 2011).  
225 Sequences were classified via the Ribosomal Database Project (training set v 9; Cole *et al.*,  
226 2013) with a confidence threshold of 80. Sequences classified as chloroplast, mitochondria,  
227 eukaryotic, or unknown were removed. Remaining sequences were clustered into Operational  
228 Taxonomic Units (OTUs) at 0.03 sequence dissimilarity using the opticlust clustering algorithm.



229 Sequence data associated with this research have been submitted to the GenBank database under  
230 accession numbers SRR6261304 – SRR6261377 (Horton et al., 2017).

231

## 232 **Chemical analysis**

233

234 Each soil layer (top, middle, and bottom) was analyzed separately for local chemistry at  
235 each site. Within each site, soil samples of the same depth (i.e., top, middle, and bottom soil  
236 samples) among duplicate/triplicate cores were combined and homogenized to obtain enough  
237 soil for chemical analyses. For chemical analysis, soil samples were sent to Michigan State  
238 University Soil & Plant Nutrient Lab (East Lansing, MI) to analyze for percent total N (“TN”),  
239 total P (“TP”, ppm), total S (“TS”, ppm),  $\text{NO}_3^-$  (ppm),  $\text{NH}_4^+$  (ppm), percent organic matter  
240 (“OM”), percent organic carbon (“OC”), and C:N. In the field, a YSI multiprobe (YSI Inc.,  
241 Yellow Springs, OH) was used to measure pH of the water residing directly above each collected  
242 soil core. Other data generated for this study, along with R code for replication of statistical  
243 methodology, can be found in the GitHub repository at <https://github.com/horto2dj/GLCW/>.

244

## 245 **Statistical analyses**

246

247 Statistical analyses were completed using R statistical software version 3.2.2 (R Core  
248 Team, 2015) unless otherwise stated. Code used for statistical analyses (and bioinformatic  
249 workflow) in this study can be found in the associated GitHub repository  
250 (<https://github.com/horto2dj/GLCW/>).

251

### 252 *Physicochemical analysis*

253

254 Differences in chemical profiles between samples within and among wetland regions  
255 were visualized using Principal Component Analysis (PCA). Prior to PCA, percentages were  
256 arcsin square root transformed and ratios were log transformed. Additionally, Pearson correlation  
257 analyses were performed to search for significant correlations between chemical variables.  
258 Collinearity in the dataset was addressed by combining highly correlated environmental  
259 variables ( $r > 0.7$ ,  $p \leq 0.001$ ). Only one of the correlated variables was included in PCA to  
260 remove exaggeration of correlated variables in PCA structure. Permutational Multivariate  
261 Analysis of Variance (perMANOVA; Anderson, 2001) was used to determine the influences of  
262 region and soil depth on physicochemical composition of samples, and 95% confidence intervals  
263 were established to compare differences among groups. Chemical depth profiles were also  
264 visualized for each wetland site to understand shifts in measured environmental variables with  
265 increasing soil depth.

266

### 267 *Alpha diversity analysis*

268

269 Alpha diversity analyses were performed to explore variation in OTU richness and  
270 evenness among wetland sites, regions, and soil depths, as well as to determine whether observed  
271 trends were driven by environmental variables. Prior to alpha diversity analyses, sequence  
272 abundance for each sample was subsampled to the lowest sequence abundance for any one  
273 sample ( $n = 48,226$  sequences). Singletons were maintained within the sequence dataset for  
274 alpha diversity analyses, as alpha diversity indices can be reliant on the presence of singletons

275 for proper estimation. Alpha diversity was calculated for each site using MOTHUR, including  
276 Chao1 richness and non-parametric Shannon diversity. Linear mixed-effect models and  
277 ANOVAs were used to test influences of wetland site, region, and soil depth on alpha diversity,  
278 controlling for wetland site as a random effect. Linear models and ANOVAs were used to test  
279 for variation in alpha diversity among wetland sites. If significant variation was found within an  
280 ANOVA result, post-hoc comparisons were implemented between sample groups using Tukey's  
281 Honest Significant Differences (HSD) tests with Bonferroni adjustments (p-values obtained by  
282 number of comparisons) for pairwise comparisons.

283

### 284 ***Beta diversity analysis***

285

286 Beta diversity analyses were used to evaluate variation in microbial community structure  
287 among wetland sites, regions, and soil depths, and to assess the extent to which observed  
288 variation was explained by environmental conditions. Singletons and doubletons were removed  
289 from the dataset for beta diversity analyses. All sequence data were maintained for beta diversity  
290 analyses and transformed using the *DeSeq2* (Love *et al.*, 2014) package, which normalized OTU  
291 abundances among samples using a variance stabilizing transformation (VST) (McMurdie &  
292 Holmes, 2014). The *phyloseq* (McMurdie & Holmes, 2013) and *Vegan* (Oksanen *et al.*, 2007)  
293 packages were used to compare beta diversity among samples. Dissimilarity in microbial  
294 community structure among samples within and among sites was visualized using Non-metric  
295 Multidimensional Scaling (NMDS) plots based on pairwise Bray-Curtis dissimilarity estimates.  
296 The function *envfit* of the *Vegan* package was used to evaluate correlation between chemical  
297 parameters and microbial community structure among samples according to NMDS. "Depth"  
298 was also implemented as a dummy variable to test correlation between depth and microbial  
299 community structure.

300

301 To test for significant differences in beta diversity among wetland sites, regions, and soil  
302 depth, perMANOVA were implemented. Specifically, these tests evaluate significant variation  
303 among within group and between group means (Clarke, 1993; Anderson, 2001; Anderson &  
304 Walsh, 2013). If perMANOVA found significant differences among groups at the global level,  
305 pairwise perMANOVA tests between groups were implemented with Bonferroni significance  
306 adjustments to control for multiple pairwise comparisons. Anderson's permutation of dispersions  
307 test (PERMDISP; Anderson, 2006; Anderson *et al.*, 2006) was used to test for differences in  
308 variance of community structure among sample groups (i.e. sites, regions, soil depths). Tukey's  
309 Honest Significant Difference (HSD) tests were implemented with adjusted p-values for multiple  
310 pairwise comparisons if significant differences in dispersion were found among groups.

311

312 To explore relationships between regional microbial community structure and  
313 environmental variables, NMDS plots were generated for each individual region. Applying  
314 NMDS to each region also allowed for the assessment of the correlational relationship between  
315 community structure and soil depth (as a dummy variable) and other environmental variables  
316 (using the *envfit* function) within individual regions. To test for differences in microbial  
317 community structure between/among sites within a region, as well as among depths within a  
318 region, perMANOVA was implemented individually for each region.

319

### 320 ***Taxonomic analyses***

321  
322 Dominant microbial taxa were explored in order to characterize microbial communities  
323 within Great Lakes coastal wetlands. Differential abundance analysis was performed for  
324 microbial OTUs between significantly different wetland regions and soil depths (according to  
325 perMANOVA results with all microbial samples included) using the *DESeq2* package. OTUs  
326 which did not appear at least twice within 10% of samples explored and were not significantly  
327 differentially abundant at  $p < 0.001$  were omitted from differential analyses to minimize spurious  
328 relationships.

329  
330

### 331 *Network analyses*

332

333 To explore relationships between microbial sub-communities and individual OTUs to  
334 environmental variables, Weighted Correlation Network Analysis (WGCNA) was implemented  
335 on OTU relative abundances using the *WGCNA* package (Langfelder & Horvath, 2008;  
336 Langfelder & Horvath, 2012), executed as previously described (Guidi *et al.*, 2016; Henson *et al.*,  
337 2018) with modifications. OTUs which did not possess at least 2 sequences across 10% of  
338 samples were removed from network analyses. These OTUs were removed to eliminate OTUs  
339 with potentially spurious correlations to environmental variables or other OTUs, as well as to  
340 reduce computational stress of analyses. Remaining OTU abundances across samples were  
341 normalized using variance stabilizing transformation (VST) performed as described previously  
342 for beta diversity analyses. To ensure scale-free topology of the network, the dissimilarity matrix  
343 generated through VST was transformed to an adjacency matrix by raising this dissimilarity  
344 matrix to a soft threshold power. A threshold power of  $p = 4$  was chosen to meet scale-free  
345 topology assumptions based upon criterion established by Zhang & Horvath (2005). Scale-free  
346 topology of network relationships was further ensured through regression of the frequency  
347 distribution of node connectivity against node connectivity; a network is scale-free if an  
348 approximate linear fit of this regression is evident (see Zhang & Horvath, [2005] for more in-  
349 depth explanation). A topological overlap matrix (TOM) was generated using the adjacency  
350 matrix, and subnetworks of highly connected and correlated OTUs were delineated with the  
351 TOM and hierarchical clustering. Representative eigenvalues of each subnetwork (i.e., the first  
352 principal component) were correlated (Pearson) with values of measured environmental variables  
353 to identify the subnetworks most related to said environmental variables. The subnetworks with  
354 the highest positive correlations to environmental variables of interest (e.g.,  $\text{NO}_3^-$ , C:N, etc.)  
355 were selected for further analyses of relationships among subnetwork structure, individual  
356 OTUs, and environmental variables. Partial Least Square regression (PLS) was used to test  
357 predictive ability of subnetworks in estimating variability of environmental parameters, which  
358 allowed for delineation of potential indicator subnetworks and OTUs. Pearson correlations were  
359 calculated between response variables and leave-one-out cross-validation (LOOCV) predicted  
360 values. If PLS found that regression between actual and predicted values was below minimum  
361 threshold of  $R^2 = 0.3$ , WGCNA analysis was halted for that network, as the network was deemed  
362 to lack predictive ability of that environmental variable. Variable Importance in Projection (VIP)  
363 (Chong & Jun, 2005) analysis was used to determine the influence of individual OTUs in PLS. A  
364 high VIP value for an OTU indicates high importance in prediction of the environmental  
365 response variable for that OTU. For network construction and visualization purposes, the  
366 minimum correlation value required between two OTUs to constitute an “edge” between them



367 was delineated at different  $r$  values for each network related to an individual environmental  
368 variable (ranging between 0.1 – 0.25), as co-correlations between OTUs within some networks  
369 were stronger than others. The number of co-correlations an OTU has with other OTUs within a  
370 network defines its “node centrality” (as described by Henson *et al.*, 2018).

371

## 372 **RESULTS**

373

### 374 **Chemical analyses**

375

376 Significant correlations ( $r > 0.7$ ,  $p \leq 0.001$ ) were found among  $\text{NH}_4^+$ , OM, OC, TN, and  
377 latitude. Thus, downstream analyses combined these values into one parameter, “NUTR”,  
378 represented by OM values as this variable was the most strongly correlated with each of the other  
379 variables. Environmental data were analyzed with a PCA and PC1 and PC2 explained 56.2% and  
380 20.6% of the variation among samples, respectively (Fig. 2). perMANOVA found significant  
381 differences in physicochemical profiles based on region ( $R^2 = 0.570$ ,  $p \leq 0.001$ ) and depth ( $R^2 =$   
382  $0.058$ ,  $p \leq 0.01$ ). Lake Erie coastal wetlands were chemically distinct from other wetland regions  
383 (ESBT and NSB; adjusted  $p = 0.01$ ) according to perMANOVA and pairwise perMANOVA  
384 based on Euclidean distance. Ninety-five percent confidence intervals demonstrated no overlap  
385 between Lake Erie coastal wetlands and other coastal wetlands (Fig. 2). This separation was  
386 related to increased NUTR,  $\text{NO}_3^-$ , and S.

387 Increasing depth within cores showed a consistent shift in environmental variables,  
388 except in those sites located in the western basin of Lake Erie (Supplemental Fig. 2).  
389 Specifically, OM, OC, and TN consistently decreased with increasing depth within each region  
390 except Lake Erie. Similarly, C:N increased with depth in each region except Lake Erie, wherein  
391 the C:N ratio remained relatively low ( $\sim 12$ ) and stable with increasing soil depth. Within the  
392 Lake Erie wetland region, pH was more acidic in the overlying water with respect to all other  
393 wetland regions (Supplemental Table 1). However, pH was still relatively neutral within Lake  
394 Erie (average  $\text{pH} = 7.26 \pm 0.24$ ), whereas other wetland regions (regions within Saginaw Bay and  
395 Beaver Archipelago) experienced slightly more basic pH, with average pH among these regions  
396 ranging between 7.72 – 8.39.

397

### 398 **Alpha diversity**

399

400 Sufficient depth of sampling was reinforced by rarefaction curve analysis (Supplemental  
401 Fig. 3). Good’s coverage values ranged between 89.3 – 93.5% for each region at the subsampled  
402 value of 48,226 sequences. Chao1 richness estimates varied significantly among wetland regions  
403 ( $F = 8.38$ ,  $p \leq 0.05$ ), as well as wetland sites ( $F = 16.78$ ,  $p \leq 0.001$ ). Pairwise comparisons found  
404 that the LE region had significantly higher ( $p \leq 0.01$ ) Chao1 estimates than NSB and WSB  
405 regions (Fig. 3; Supplemental Table 2). Additionally, pairwise comparisons found a high degree  
406 of significant variability ( $p \leq 0.01$ ) in Chao1 estimates among wetland sites (Supplemental Table  
407 2). Further, Shannon diversity levels also significantly varied among wetland sites ( $F = 4.57$ ,  $p \leq$   
408  $0.001$ ), with site LE\_D having significantly higher ( $p \leq 0.01$ ) Shannon diversity levels than sites  
409 ESBT\_A and WSB\_B (Supplemental Table 2). Soil depth did not influence alpha diversity  
410 levels.

411

412 Shannon diversity and Chao1 were both positively correlated with measured  
413 environmental variables (Table 1). Specifically, Chao1 estimates increased with  $\text{NO}_3^-$ , P, and S  
414 concentrations ( $p \leq 0.01$ ), and were weakly positively correlated ( $p \leq 0.05$ ) with NUTR.  
415 Additionally, Shannon diversity levels increased alongside NUTR and S ( $p \leq 0.001$ ), and were  
416 weakly positively correlated with  $\text{NO}_3^-$  ( $p \leq 0.05$ ). There were no significant relationships  
417 between alpha diversity and C:N, and alpha diversity was not negatively correlated with any of  
418 the measured environmental variables.

419

## 420 **Beta diversity**

421

### 422 *Beta diversity among regions*

423

424 Multivariate analyses were implemented to explore relationships between microbial  
425 communities and environmental gradients among wetland regions. NMDS demonstrated  
426 separation of microbial communities based on wetland site, region, and soil depth (Fig. 4).  
427 Substantiating this result, perMANOVA confirmed that differences in microbial community  
428 structure were significantly related to wetland region ( $R^2 = 0.220$ ,  $p \leq 0.001$ ), site ( $R^2 = 0.119$ ,  $p$   
429  $\leq 0.001$ ), and soil depth ( $R^2 = 0.070$ ;  $p \leq 0.001$ ). Post-hoc pairwise perMANOVA found that  
430 community structure within the LE region was significantly distinct ( $p \leq 0.01$ ) from all other  
431 wetland regions (Table 2). No significant differences in community structure were found  
432 between any other wetland regions compared. Additionally, microbial community beta diversity  
433 was distinct ( $p \leq 0.003$ ) between the top soil depth and the middle and bottom soil depths.  
434 However, no significant differences in microbial community structure were found between the  
435 middle and bottom soil depths (Table 2). Variation in microbial community structure was  
436 significantly correlated ( $p \leq 0.001$ ) to depth ( $r = 0.41$ ),  $\text{NO}_3^-$  ( $r = 0.20$ ), NUTR ( $r = 0.60$ ), and S  
437 ( $r = 0.41$ ), and also correlated ( $p \leq 0.016$ ) with C:N ( $r = 0.11$ ) and P ( $r = 0.14$ ) (Supplemental  
438 Table 3).

439

440 Beta dispersion tests suggested significant variation in structural variance among regions  
441 ( $p \leq 0.05$ ), however, Tukey's HSD test using adjusted p-values for multiple comparisons did not  
442 find any significance ( $p > 0.05$ ) between pairwise comparisons of regional groups. There were no  
443 differences in community structural dispersion among soil depths.

444

### 445 *Beta diversity within regions*

446

447 Microbial community associations with environmental variables were also explored  
448 within regions to examine variation among wetland sites. Individual NMDS plots of each region  
449 identified relationships between microbial community structure and several environmental  
450 variables using vector-fitting regression, and strengths of these relationships were dependent  
451 upon the wetland region explored (Fig. 5; Supplemental Table 3). Depth was significantly related  
452 ( $p \leq 0.05$ ) to microbial community structure in all wetland regions except NSB and LE.  
453 However, microbial community structure may have been more strongly related to depth in NSB  
454 ( $r = 0.35$ ,  $p = 0.071$ ) than LE ( $r = 0.19$ ,  $p = 0.40$ ). NUTR was significantly related ( $p \leq 0.01$ ) to  
455 community structure within regions BA ( $r = 0.82$ ), ESBT ( $r = 0.51$ ), and LE ( $r = 0.66$ ). C:N was  
456 related ( $p \leq 0.01$ ) to community structure within regions of Saginaw Bay (i.e., ESBT [ $r = 0.65$ ],

457 NSB [ $r = 0.58$ ], and WSB [ $r = 0.58$ ]). Beta diversity was not significantly associated with  
458 concentrations of  $\text{NO}_3^-$  in any region.

459

460 To test for significant differences in microbial beta diversity within regions,  
461 perMANOVA was used to evaluate differences in microbial community structure among soil  
462 depths and sites within wetland regions (Supplemental Table 3). Depth did not significantly  
463 explain microbial community structure within the region LE ( $p = 0.65$ ), however, it did explain  
464 differences in microbial community structure within the other wetland regions, specifically BA  
465 ( $R^2 = 0.414$ ;  $p = 0.006$ ), ESBT ( $R^2 = 0.154$ ;  $p = 0.001$ ), NSB ( $R^2 = 0.161$ ;  $p = 0.093$ ), and WSB  
466 ( $R^2 = 0.259$ ;  $p = 0.014$ ). Significant differences in microbial community structure were found  
467 among different wetland sites within regions ESBT ( $R^2 = 0.192$ ;  $p = 0.001$ ), LE ( $R^2 = 0.236$ ;  $p =$   
468  $0.004$ ), and NSB ( $R^2 = 0.140$ ;  $p = 0.003$ ). As only one site was sampled within the BA region,  
469 testing for differences among wetland sites within the BA region could not be accomplished.

470

## 471 Taxonomic analyses

472

473 At the level of Phylum, wetland sites were dominated by similar consortia of bacteria and  
474 archaea. Soils had a high relative abundance of *Proteobacteria*, with *Deltaproteobacteria* and  
475 *Betaproteobacteria* comprising the largest fraction of *Proteobacteria* (ranging between 7 – 15%  
476 of tall taxa; Supplemental Fig. 4). Other relatively abundant bacteria included the phyla  
477 *Bacteroidetes*, *Chloroflexi*, *Verrucomicrobia*, *Firmicutes*, *Acidobacteria*, *Chlorobi*,  
478 *Actinobacteria*, and *Planctomycetes*, and the classes *Gammaproteobacteria* and  
479 *Alphaproteobacteria* within the phylum *Proteobacteria*. One archaeal phyla, *Euryarchaea*, was  
480 abundant within wetland soils, ranging between 2 – 5% relative abundance within each wetland  
481 site. Between 21 – 32% of bacterial and archaeal taxa among sites were unclassified.

482

483 Differential analysis comparing the LE region to all other wetland regions (i.e., BA,  
484 ESBT, NSB, and NSB) identified 1,182 OTUs which were differentially abundant across 44  
485 Classes within 15 Phyla (Fig. 6). Differential analysis comparing the top section of wetland soil  
486 to the bottom section of wetland soil found 516 OTUs which were differentially abundant  
487 between the two zones across 33 Classes within 15 Phyla (Fig. 7).

488

## 489 Network analyses

490

491 Weighted Correlation Network Analysis (WGCNA) was used to explore strong  
492 relationships between subcommunities and individual OTUs with environmental parameters  
493 within Great Lakes coastal wetlands. After removal of OTUs that did not have at least two  
494 representative sequences in at least 10% of samples, a total of 7,562 OTUs remained for  
495 WGCNA. In determining scale-free topology of the OTU network, a soft power threshold of 4  
496 was reached, and an  $R^2$  of 0.87 was established as linear fit from the regression of the frequency  
497 distribution of node connectivity against node connectivity (Supplemental Fig. 5). Of the 33  
498 constructed subnetworks, the same one (subnetwork “orange”) was found to be most strongly  
499 correlated to both NUTR ( $r = 0.94$ ) and  $\text{NO}_3^-$  ( $r = 0.55$ ) (Supplemental Fig. 6). A separate  
500 subnetwork (“pink”) was strongly correlated ( $r = 0.74$ ) to C:N. All correlations of subnetworks to  
501 environmental variables were significant ( $p \leq 0.001$ ). OTU VIP values  $\leq 1$  were removed due to  
502 the large amount of OTUs within subnetworks correlated with C:N for visualization purposes.

503

504 For subnetwork relationships to NUTR (including OM, OC,  $\text{NH}_4^+$ , and TN), partial least  
505 squares analysis (PLS) found that 69 OTUs were 93.8% predictive of variance in NUTR  
506 (Supplemental Fig. 7). OTU co-correlation networks were constructed using an OTU co-  
507 correlation threshold of 0.25, with strong correlations ( $r > 0.59$ ) between all OTUs and NUTR  
508 (Fig. 8). Of the top 15 OTUs contributing to PLS regression by VIP score, seven were related to  
509 *Betaproteobacteria*, five were related to *Anaerolineaceae* (within *Chloroflexi*), and one  
510 representative OTU was related to each of *Bellilinea* (*Chloroflexi*), *Desulfobacterales*  
511 (*Deltaproteobacteria*), and *Rhizobiales* (*Alphaproteobacteria*).

512

513 For subnetwork relationships to C:N, PLS found that 144 OTUs were 59.0% predictive of  
514 variance in C:N (Supplemental Fig. 8). Networks were constructed using an OTU co-correlation  
515 threshold of 0.1, within positive or negative correlations ( $r > +/- 0.2$ ) between OTUs (VIP > 1)  
516 and C:N (Fig. 9). Of the top 15 OTUs by VIP score within the network, two OTUs related to  
517 *Bacteroidetes* were negatively correlated with C:N. Other top OTUs were positively related to  
518 C:N, including seven OTUs related to *Anaerolineaceae*, four OTUs which were unclassified  
519 *Bacteria*, and one representative OTU related to each of *Bacillus* (*Firmicutes*) and *Chloroflexi*.

520

## 521 DISCUSSION

522

### 523 Microbial diversity driven by chemistry within Great Lakes coastal wetlands

524

525 This study is the first to suggest that anthropogenic disturbance patterns correspond to  
526 microbial community differences in Great Lakes coastal wetlands as consistent with other  
527 taxonomic groups such as plants, birds, fish, and invertebrates (Howe *et al.*, 2007; Tulbure *et al.*,  
528 2007; Uzarski *et al.*, 2009; Cooper *et al.*, 2012; Uzarski *et al.*, 2017). Microbial communities  
529 appear to respond uniquely to potential anthropogenic influence, as diversity increased with  
530 increasing nutrient levels in the coastal wetlands explored in this study. However, microbial  
531 community structure was significantly dissimilar between LE and all other wetland regions, and  
532 these differences were related to physicochemical differences among coastal wetlands (Fig. 2,  
533 Fig. 4, Table 2). As the wetlands within the Lake Erie region maintained the highest nutrient  
534 concentrations within the soil, it is possible that anthropogenic stressors related to nutrient  
535 loading (and potentially other pollutants) could be driving structural differences in microbial  
536 communities among Great Lakes coastal wetlands. Further, network analysis found several  
537 taxa/sub communities that were highly correlated to nutrient levels across wetlands explored in  
538 this study. Previous research has found that nutrient levels (e.g., C, N, P, etc.), to varying  
539 degrees, can influence microbial community composition and structure (Hartman *et al.*, 2008;  
540 Peralta *et al.*, 2013; Ligi *et al.*, 2014; Arroyo *et al.*, 2015). Lake Erie coastal wetlands (and the  
541 watershed which drains into them) have been historically impacted by anthropogenic pollution  
542 and agricultural practices, particularly in comparison to other coastal wetlands within the  
543 Laurentian Great Lakes region. This has been demonstrated by multiple ecological indices (e.g.,  
544 Cvetkovic & Chow-Fraser, 2011; Uzarski *et al.*, 2017) and physicochemical uniqueness  
545 (increased levels of nutrients and particulate matter) within the western basin of Lake Erie (Danz  
546 *et al.*, 2007; Trebitz *et al.*, 2007; Cvetkovic & Chow-Fraser, 2011; Uzarski *et al.*, 2017). Data  
547 presented in this study corroborate this historical evidence of human impact and nutrient loading

548 in the western basin of Lake Erie (Fig. 2., Supplemental Fig. 1), which may be influencing the  
549 Lake Erie wetlands explored in this study.

550

551 High nutrient influx could also be influencing the chemical and microbial vertical  
552 structure within coastal wetland soils. Microbial community and chemical (e.g., C, N, P) vertical  
553 structure was not evident within the first 6 cm of soil of coastal wetlands with elevated nutrient  
554 levels (e.g. Lake Erie sites). The lack of vertical chemical gradients is unlikely to exclusively  
555 explain a corresponding lack of vertical microbial community structure, as some wetland sites  
556 lower in nutrient levels also did not experience vertical chemical gradients in this study (e.g.  
557 West Saginaw Bay). One possibility is that a lack of vertical chemical structure in conjunction  
558 with high nutrient levels in wetland soils could reduce vertical microbial community structure. It  
559 has been previously demonstrated that concentrations of carbon electron donors may influence  
560 redox gradients within wetland soils (Achnich *et al.*, 1995), and wetland microbial communities  
561 have been demonstrated to correspond with soil redox gradients (Lüdemann *et al.*, 2000; Edlund  
562 *et al.*, 2008; Lipson *et al.*, 2015). However, connections between microbial community metabolic  
563 shifts with soil depth and levels of dissolved organic carbon *in situ* remain unresolved in  
564 freshwater wetlands (Alewell *et al.*, 2008). Alternatively, another explanation for lack of vertical  
565 community structure could be microsite heterogeneity throughout the soil matrix. Previous  
566 research in freshwater wetland soils has suggested that microsite heterogeneity may explain  
567 coexistence of microbial functional guilds (Alewell *et al.*, 2008; Angle *et al.*, 2017), which could  
568 substantially reduce vertical microbial community structural gradients. However, it is necessary  
569 to better link microbial community diversity, microbial activity, chemical structure, and  
570 microsite heterogeneity to establish relationships between microbial communities and freshwater  
571 soil structure. As a caveat, it is possible that chemical and microbial structuring still exists within  
572 wetlands with high nutrient levels, yet is not evident within the first 6 cm of soil or at the spatial  
573 scale measured in this study. Nevertheless, microbial communities within coastal wetlands with  
574 high nutrient levels did not follow the same pattern of vertical structure evident in other  
575 comparable coastal wetlands, either chemically or biologically, further suggesting that the  
576 integrity of microbial communities within coastal wetland systems may be susceptible to  
577 negative anthropogenic pressure.

578

579 While relationships between microbial diversity and nutrient levels among coastal  
580 wetlands are strong, other unexplored variables unique to Lake Erie (such as geologic history)  
581 could also be influencing uniqueness of chemical and microbial profiles in Lake Erie coastal  
582 wetlands. The Lake Erie coastal wetland sites explored here were barrier (protected) wetlands,  
583 while other wetland sites explored in this study are all classified as lacustrine (open water)  
584 wetlands ([www.greatlakeswetlands.org](http://www.greatlakeswetlands.org)). As such, wave action from the Great Lakes impacted  
585 wetlands within the western basin of Lake Erie to a lesser degree than other wetlands, thereby  
586 reducing sediment export rates into the Great Lakes themselves. Hydrologic energy was found to  
587 impact wetland primary productivity and respiration in Lake Huron coastal wetlands, suggesting  
588 Great Lakes ecosystems may exert unique environmental forces on wetland microbial  
589 communities (Cooper *et al.*, 2013). Low carbon export rates or elevated sedimentation rates may  
590 exist in the western basin of Lake Erie as consequence of low wave action in these wetlands,  
591 which may influence the chemical and biological structure (such as vertical microbial  
592 community structure) within wetland soils of this region. Nevertheless, previous research at the  
593 same wetland locations explored in this study have demonstrated that wetlands within the



594 western basin of Lake Erie are highly degraded with respect to other wetlands (Uzarski *et al.*,  
595 2017), particularly with respect to physicochemical conditions. Additionally, the same vegetation  
596 zone (dominated by cattails or bulrush) was sampled among all wetlands explored in this study  
597 as an attempt to reduce bias in distinct environmental conditions which may exist in other  
598 vegetation zones among wetland sites. Burton *et al.* (2002) suggested that soil organic content  
599 was related to plant zonation in Great Lakes coastal wetlands. Further research would be  
600 necessary to fully tease apart the effects of anthropogenic stress and other natural contributions  
601 to differences in microbial communities among coastal wetlands.

602

### 603 **Taxonomic patterns among wetland regions and soil depths**

604

605 At the level of phylum, Great Lakes coastal wetlands shared many similarities regardless  
606 of environmental conditions (Supplemental Fig. 4), and shared dominant groups such as  
607 *Deltaproteobacteria*, *Betaproteobacteria*, *Gammaproteobacteria*, *Bacteroidetes*, and  
608 *Chloroflexi*. These bacterial groups have been commonly found within other wetland soils  
609 (Hartman *et al.*, 2008; Ansola *et al.*, 2014; Arroyo *et al.*, 2015). However, there were distinct  
610 differences in community composition among wetland regions as demonstrated by  
611 perMANOVA and NMDS, particularly between LE and all other regions. More specifically,  
612 several *Planctomycetes* OTUs were less abundant within LE than within other wetland regions  
613 (Fig. 6), suggesting this taxonomic group may thrive in less impacted wetland soils. This pattern  
614 was similar for other groups of bacterial taxa, including *Spartobacteria*, *Sphingobacteria*,  
615 *Clostridia*, and *Caldilineae*, as well as archaeal taxa including methanogenic *Methanomicrobia*  
616 such as *Methanocella*, *Methanoregula*, *Methanosaeta* and *Methanosarcina*. It is important to  
617 recognize that, while unique patterns in archaeal diversity were found among wetland regions,  
618 primers employed in this study were not designed to explore archaeal diversity, and thus this  
619 representation of archaeal diversity is likely incomplete. Several Acidobacteria OTUs were  
620 uniquely abundant in LE wetlands (e.g. Acidobacteria Groups 6, 17, and 18). Acidobacterial  
621 abundance has been shown to increase with decreasing pH within soil environments (Jones *et al.*,  
622 2009), and as such, the relatively lower pH of LE soils with respect to other wetland regions may  
623 be driving this trend within freshwater coastal wetlands.

624

625 Several other taxonomic groups of microbes were differentially abundant among wetland  
626 soil habitats, often dependent on soil depth. Perhaps most interestingly, archaeal OTUs within  
627 *Chrenarchaeota* and *Euryarchaeota* were more relatively abundant in soils between 4 – 6 cm in  
628 depth, particularly within Classes *Thermoprotei*, *Methanomicrobia*, and *Methanobacteria*. Many  
629 of these OTUs were identified to the genus level, including the methanogenic *Methanosaeta*,  
630 *Methanoregula*, and *Methanobacterium*. Recent research has suggested that methanogenic  
631 activity can often be highest within oxygenated soils, which can occur within the top 10 cm of  
632 freshwater wetland soils (Angle *et al.*, 2017). As soils within our study were sampled to a  
633 maximum depth of 6 cm, it is possible that methanogens within Great Lakes coastal wetlands  
634 may be active in the oxygenated layer of soils, particularly between 4 – 6 cm where oxygen,  
635 while possibly present, is lower than layers of soil directly above. However, oxygen was not  
636 measured within the soil of this study, and thus further research would be necessary to  
637 understand whether oxygen is permeating to 4 cm depth in wetland soils explored herein. Within  
638 the top 0 – 2 cm of soil, several bacterial OTUs were differentially abundant, most notably

639 within taxonomic groups such as *Alpha-*, *Beta-*, and *Gammaproteobacteria*, several groups of  
640 *Acidobacteria*, *Spartobacteria*, *Verrucomicrobiae*, *Planctomycetes*, and *Sphingobacteria*.

641

### 642 **Relationships between microbial subnetworks and environmental gradients**

643

644 Through network analyses, multiple subcommunities were delineated which were  
645 significantly related to environmental gradients (such as nutrients C, N, and P) among coastal  
646 wetlands sampled in this study. Specifically, a subnetwork of 69 microbial taxa was 93.8%  
647 predictive of nutrient level variation among coastal wetland soils. Several microbial taxa within  
648 this subcommunity were individually predictive of nutrient levels to a high degree, including  
649 several OTUs within *Anaerolineaceae*, one OTU within genus *Anaerolinea*, and another within  
650 genus *Bellilinea*. From the genus *Anaerolinea*, two thermophilic chemoorganotrophs  
651 (*Anaerolinea thermophila* and *Anaerolinea thermolimosa*) have been isolated (Sekiguchi *et al.*,  
652 2003; Yamada *et al.*, 2006). Only one isolated member has been established within the genus  
653 *Bellilinea* (*Bellilinea caldifistulae*); it has been described as a thermophilic, fermentative,  
654 obligate anaerobe which thrives in co-culture with methanogens (Yamada *et al.*, 2007). It is  
655 unlikely that the OTUs found in our study are the same species as the isolated *Anaerolinea* and  
656 *Bellilinea* species, as coastal wetland soils are not high-temperature environments necessary for  
657 thermophilic species. Additionally, no OTUs related to methanogenic archaea were found within  
658 this subnetwork, suggesting that *Anaerolineaceae* OTUs within coastal wetland soils may  
659 fluctuate independently of any specific methanogenic OTUs. It is possible that the *Bellilinea*  
660 OTU found within the subnetwork is related to nutrient level concentrations. This would support  
661 fermentative metabolism as noted within *Bellilinea caldifistulae*. It is important to note that  
662 several other studies have discovered OTUs related to *Anaerolineaceae* within wetland soils,  
663 with upwards of 90% relative abundance among *Chloroflexi* OTUs within these systems (Ansola  
664 *et al.*, 2014; Deng *et al.*, 2014; Hu *et al.*, 2016). This suggests that there are probable mesophilic  
665 species yet to be isolated within this ubiquitous family of bacteria, which may be of high  
666 importance within wetland soils. Interestingly, the majority of OTUs (61 out of 69 OTUs) within  
667 the subnetwork most related to NUTR shifts were also differentially abundant between LE and  
668 all other regions (Fig. 6). The parallels drawn between these two analyses highlights the potential  
669 importance of NUTR (NH<sub>4</sub><sup>+</sup>, OM, OC, TN) in driving differences in microbial OTU abundances  
670 between LE and other coastal wetland regions.

671

672 *Betaproteobacteria* were also found to significantly predict nutrient levels among coastal  
673 wetlands. Hu *et al.* (2016) found that both *Betaproteobacteria* and *Anaerolineae* were positively  
674 related to TN levels, which is consistent with the data presented here, and these two taxa were  
675 suggested to contribute to higher levels of heterotrophic activity. Further, *Anaerolineaceae*  
676 OTUs were consistently related to increasing C:N, suggesting that many taxa within this family  
677 have preference for recalcitrant carbon sources. As C:N also tends to increase with soil depth, it  
678 is also probable that the putatively obligate anaerobic *Anaerolineaceae* are coinciding with  
679 decreasing oxygen levels and/or changing metabolism requirements with increasing soil depth.

680

681 Development of biological indices and establishment of indicator taxa have been  
682 suggested as necessary for microbial communities within wetlands (Uzarski *et al.*, 2017),  
683 particularly through the use of high-throughput sequencing technologies which now allow for  
684 deep assessment of microbial community composition and structure within environmental

685 samples (Sims *et al.*, 2013; Urakawa & Bernhard, 2017). Specifically within Great Lakes coastal  
686 wetlands, it is integral to develop ecosystem health indicators based upon multiple different  
687 groups of taxonomy, as separate biological indices can present contrasting assessments of  
688 wetland health (Uzarski *et al.*, 2017). As microbial indicators have yet to be established in Great  
689 Lakes coastal wetlands, this research begins the first steps in exploring how microbial  
690 communities can be used as an additional and potentially important ecosystem health indicator.  
691 In addition to their importance as biological signals for environmental health, microbial indicator  
692 taxa may play prominent roles in bioremediation of excess nutrients and pollutants found within  
693 anthropogenically impacted coastal wetlands. Network analyses in this study have allowed for  
694 the generation of hypothetical subcommunities of diverse microbial taxa related to nutrient levels  
695 among Great Lakes coastal wetlands, and could assist in further understanding of which  
696 microbial taxa may be responding to anthropogenic stress in these ecosystems.

697

## 698 CONCLUSIONS

699

700 This study marks the first characterization of microbial communities within Great Lakes  
701 coastal wetlands. Coastal wetlands are integral in the proper functioning of biogeochemical  
702 cycles and environmental sustainability of the Great Lakes. While it has long been known that  
703 anthropogenic pressure can impact animal and plant communities within these coastal wetlands,  
704 this is the first evidence that these pressures may also be influencing microbial communities and  
705 may be influencing biogeochemical cycles by extension. Alpha and beta diversity were both  
706 related to nutrient gradients among and within regions, suggesting that variability in microbial  
707 community structure is highly coupled to geochemistry within wetland soils. We propose that  
708 wetland microbial community structure can also potentially be used to assess a wetland for  
709 monitoring purposes. As illustrated within this study, wetland microbial community structure  
710 and depth are decoupled within the wetlands experiencing the highest nutrient levels, likely  
711 originating from terrestrial inputs due to human activity. As such, multivariate statistics (as used  
712 in the methods of this study) may prove useful in examining relationships between wetland soil  
713 depth and microbial community structure alongside microbial network analyses, which could  
714 provide biological indicators of nutrient loading stress on coastal wetland habitats. We propose  
715 that wetland microbial community structure can also potentially be used to assess a wetland for  
716 monitoring purposes.

717

718 Further, this study provides insight on microbial community subnetworks and individual  
719 OTUs, which were predictive of chemical concentrations, and may be useful for future  
720 management of Great Lakes coastal wetland systems. Within subnetworks existed multiple taxa  
721 with strong individual relationships to environmental gradients among coastal wetlands  
722 throughout the Great Lakes. Even further, several community members within these subnetworks  
723 were taxonomically related (such as OTUs related to *Anaerolineaceae* within *Chloroflexi*),  
724 suggesting that specific taxonomic groups of microbes may be useful to explore further as  
725 potential biological indicator groups. This study highlights the strength of network analyses  
726 (such as WGCNA) in delineating hypothetical networks of interacting microbes, and whether  
727 these networks are predictive of physical or chemical gradients measured within an environment.

728

## 729 ACKNOWLEDGEMENTS

730

731 Special thanks to Alexandra Bozimowski and Thomas Langer for their assistance in  
732 collecting the wetland samples and data acquisition, as well as Dr. Matthew Cooper for  
733 providing valuable insight and conversation on wetland ecology and the custom-built core  
734 extruder built by Mr. Gary Cooper. Special thanks also to Mike Henson for providing assistance  
735 on network statistical analyses. This paper is Contribution Number XX of the Central Michigan  
736 University Institute for Great Lakes Research.

737

738

## 739 **FUNDING**

740

741 Funding was provided, in part, by the CMU College of Science and Engineering.  
742 Additional funding for this work was provided by the Great Lakes National Program Office  
743 under the United States Environmental Protection Agency, grant number GL-00E00612-0 as part  
744 of the US federal government's Great Lakes Restoration Initiative. Although the research  
745 described in this work has been partly funded by the United States Environmental Protection  
746 Agency, it has not been subjected to the agency's required peer and policy review, and therefore,  
747 does not necessarily reflect the views of the agency and no official endorsement should be  
748 inferred.

749

750 **Conflict of Interest.** The authors declare no conflicts of interest.

751

752

## 753 **REFERENCES**

754

755 Achtnich, C., Bak, F., and Conrad, R. (1995). Competition for electron donors among nitrate  
756 reducers, ferric iron reducers, sulfate reducers, and methanogens in anoxic paddy soil. *Biol Fert*  
757 *Soils*. 19(1), 65-72.

758

759 Alewell, C., Paul, S., Lischeid, G., and Storck, F.R. (2008). Co-regulation of redox processes in  
760 freshwater wetlands as a function of organic matter availability?. *Sci Total Environ* 404(2), 335-  
761 342.

762

763 Anderson, M.J. (2001). A new method for non-parametric multivariate analysis of variance.  
764 *Austral Ecol* 26(1), 32-46.

765

766 Anderson, M.J. (2006). Distance-based tests for homogeneity of multivariate dispersions.  
767 *Biometrics* 62(1), 245-253.

768

769 Anderson, M.J., Ellingsen, K.E., and McArdle, B.H. (2006). Multivariate dispersion as a  
770 measure of beta diversity. *Ecol Lett* 9(6), 683-693.

771

772 Anderson, M.J., and Walsh, D.C. (2013). PERMANOVA, ANOSIM, and the Mantel test in the  
773 face of heterogeneous dispersions: what null hypothesis are you testing?. *Ecol Monogr* 83(4),  
774 557-574.

775

- 776 Angle, J.C., Morin, T.H., Solden, L.M., Narrowe, A.B., Smith, G.J., Borton, M.A., *et al.* (2017).  
777 Methanogenesis in oxygenated soils is a substantial fraction of wetland methane emissions. *Nat*  
778 *Commun* 8(1), 1567.  
779
- 780 Ansola, G., Arroyo, P., and de Miera, L.E.S. (2014). Characterisation of the soil bacterial  
781 community structure and composition of natural and constructed wetlands. *Sci Total Environ*  
782 473, 63-71.  
783
- 784 Arroyo, P., de Miera, L.E.S., and Ansola, G. (2015). Influence of environmental variables on the  
785 structure and composition of soil bacterial communities in natural and constructed wetlands. *Sci*  
786 *Total Environ* 506, 380-390.  
787
- 788 Burton, T.M., Stricker, C.A., and Uzarski, D.G. (2002). Effects of plant community composition  
789 and exposure to wave action on invertebrate habitat use of Lake Huron coastal wetlands. *Lakes*  
790 *& Reservoirs: Research and Management*. 7: 255-269.  
791
- 792 Campbell, M., Cooper, M.J., Friedman, K., and Anderson, W.P. (2015). The economy as a driver  
793 of change in the Great Lakes–St. Lawrence River basin. *J Great Lakes Res* 41, 69-83.  
794
- 795 Caporaso, J.G., Lauber, C.L., Walters, W.A., Berg-Lyons, D., Huntley, J., Fierer, N., *et al.*  
796 (2012). Ultra-high-throughput microbial community analysis on the Illumina HiSeq and MiSeq  
797 platforms. *ISME J* 6(8), 1621-1624.  
798
- 799 Chong, I.G., and Jun, C.H. (2005). Performance of some variable selection methods when  
800 multicollinearity is present. *Chemometr Intell Lab* 78(1), 103-112.  
801
- 802 Clarke, K.R. (1993). Non-parametric multivariate analyses of changes in community structure.  
803 *Aust J Ecol* 18, 117-143.  
804
- 805 Cole J.R., Wang Q., Fish J.A., Chai B., Mcgarrell D.M., Sun Y., *et al.* (2013) Ribosomal  
806 Database Project: data and tools for high throughput rRNA analysis. *Nucleic Acids Res* 42(D1),  
807 doi:10.1093/nar/gkt1244  
808
- 809 Conrad, R. (1996). Soil microorganisms as controllers of atmospheric trace gases (H<sub>2</sub>, CO, CH<sub>4</sub>,  
810 OCS, N<sub>2</sub>O, and NO). *Microbiol Rev* 60(4), 609-640.  
811
- 812 Cooper, M.J., Gyekis, K.F., and Uzarski, D.G. (2012). Edge effects on abiotic conditions,  
813 zooplankton, macroinvertebrates, and larval fishes in Great Lakes fringing marshes. *J Great*  
814 *Lakes Res* 38(1), 142-151.  
815
- 816 Cooper, M.J., Steinman, A.D., and Uzarski, D.G. (2013). Influence of geomorphic setting on the  
817 metabolism of Lake Huron fringing wetlands. *Limnol Oceanogr* 58(2), 452-464.  
818
- 819 Cvetkovic, M., and Chow-Fraser, P. (2011). Use of ecological indicators to assess the quality of  
820 Great Lakes coastal wetlands. *Ecological Indicators* 11(6), 1609-1622.  
821



- 822 Dahl, T.E. (1990). Wetlands losses in the United States 1780's to 1980's. U.S. Department of the  
823 Interior, Fish and Wildlife Service, Washington. D.C. 13pp.  
824
- 825 Danz, N.P., Niemi, G.J., Regal, R.R., Hollenhorst, T., Johnson, L.B., Hanowski, J.M., *et al.*  
826 (2007). Integrated measures of anthropogenic stress in the US Great Lakes basin. *Environ*  
827 *Manage* 39(5), 631-647.  
828
- 829 Deng, Y., Cui, X., Hernández, M., and Dumont, M.G. (2014). Microbial diversity in hummock  
830 and hollow soils of three wetlands on the Qinghai-Tibetan Plateau revealed by 16S rRNA  
831 pyrosequencing. *PLoS One* 9(7), e103115.  
832
- 833 Edgar, R.C., Haas, B.J., Clemente, J.C., Quince, C., and Knight, R. (2011). UCHIME improves  
834 sensitivity and speed of chimera detection. *Bioinformatics* 27(16), 2194-2200.  
835
- 836 Edlund, A., Hårdeman, F., Jansson, J.K., and Sjöling, S. (2008). Active bacterial community  
837 structure along vertical redox gradients in Baltic Sea sediment. *Environ Microbiol* 10(8), 2051-  
838 2063.  
839
- 840 Faust, K., & Raes, J. (2012). Microbial interactions: from networks to models. *Nat Rev*  
841 *Microbiol* 10(8), 538.  
842
- 843 Guidi, L., Chaffron, S., Bittner, L., Eveillard, D., Larhlimi, A., Roux, S., *et al.* (2016). Plankton  
844 networks driving carbon export in the oligotrophic ocean. *Nature* 532(7600), 465.  
845
- 846 Hackett, R.A., Babos, H.B., Collins, E.E., Horton, D., Schock, N., and Schoen, L.S. (2017).  
847 Researcher disciplines and the assessment techniques used to evaluate Laurentian Great Lakes  
848 coastal ecosystems. *J Great Lakes Res* 43(1), 9-16.  
849
- 850 Hartman, W.H., Richardson, C.J., Vilgalys, R., and Bruland, G.L. (2008). Environmental and  
851 anthropogenic controls over bacterial communities in wetland soils. *P Natl Acad Sci* 105(46),  
852 17842-17847.  
853
- 854 Hecnar, S.J. (2004). Great Lakes wetlands as amphibian habitats: a review. *Aquat Ecosyst Health*  
855 7(2), 289-303.  
856
- 857 Henson, M. W., Hanssen, J., Spooner, G., Fleming, P., Pukonen, M., Stahr, F., & Thrash, J. C.  
858 (2018). Nutrient dynamics and stream order influence microbial community patterns along a  
859 2914 kilometer transect of the Mississippi River. *Limnol Oceanogr*.  
860
- 861 Hill, B.H., Elonen, C.M., Jicha, T.M., Cotter, A.M., Trebitz, A.S., and Danz, N.P. (2006).  
862 Sediment microbial enzyme activity as an indicator of nutrient limitation in Great Lakes coastal  
863 wetlands. *Freshwater Biol* 51(9), 1670-1683.  
864
- 865 Horton, D.J., Theis, K.R., Uzarski, D.G., Learman, D.R. Data from: Microbial community  
866 structure corresponds to nutrient gradients and human impact within coastal wetlands of the  
867 Great Lakes. GenBank. (2017). Accession: PRJNA417157

868  
869 Howe, R.W., Regal, R.R., Hanowski, J., Niemi, G.J., Danz, N.P., and Smith, C.R. (2007). An  
870 index of ecological condition based on bird assemblages in Great Lakes coastal wetlands. *J Great*  
871 *Lakes Res* 33(sp3), 93-105.  
872  
873 Hu, Y., Wang, L., Fu, X., Yan, J., Wu, J., Tsang, Y., *et al.* (2016). Salinity and nutrient contents  
874 of tidal water affects soil respiration and carbon sequestration of high and low tidal flats of  
875 Jiuduansha wetlands in different ways. *Sci Total Environ* 565, 637-648.  
876  
877 Jackson, C.R., Foreman, C.M., and Sinsabaugh, R.L. (1995). Microbial enzyme activities as  
878 indicators of organic matter processing rates in a Lake Erie coastal wetland. *Freshwater biol*  
879 34(2), 329-342.  
880  
881 Jones, R.T., Robeson, M.S., Lauber, C.L., Hamady, M., Knight, R., and Fierer, N. (2009). A  
882 comprehensive survey of soil acidobacterial diversity using pyrosequencing and clone library  
883 analyses. *ISME J* 3(4), 442.  
884  
885 Kögel-Knabner, I., Amelung, W., Cao, Z., Fiedler, S., Frenzel, P., Jahn, R., *et al.* (2010).  
886 Biogeochemistry of paddy soils. *Geoderma* 157(1), 1-14.  
887  
888 Kozich, J.J., Westcott, S.L., Baxter, N.T., Highlander, S.K., Schloss, P.D. (2013) Development  
889 of a Dual-Index Sequencing Strategy and Curation Pipeline for Analyzing Amplicon Sequence  
890 Data on the MiSeq Illumina Sequencing Platform. *Appl Environ Microb* 79(17), 5112-5120.  
891  
892 Krantzberg, G., and De Boer, C. (2008). A valuation of ecological services in the Laurentian  
893 Great Lakes Basin with an emphasis on Canada. *Am Wat Works Assoc J* 100(6), 100.  
894  
895 Lamers, L.P., Van Diggelen, J.M., den Camp, H.J.O., Visser, E.J., Lucassen, E.C., Vile, M.A., *et*  
896 *al.* (2012). Microbial transformations of nitrogen, sulfur, and iron dictate vegetation composition  
897 in wetlands: a review. *Front Microbiol*, 3:156.  
898  
899 Langfelder, P., and Horvath, S. (2008). WGCNA: an R package for weighted correlation  
900 network analysis. *BMC Bioinformatics* 9(1), 559.  
901  
902 Langfelder, P., and Horvath, S. (2012). Fast R functions for robust correlations and hierarchical  
903 clustering. *J Stat Softw* 46(11).  
904  
905 Ligi, T., Oopkaup, K., Truu, M., Preem, J.K., Nõlvak, H., Mitsch, W.J., *et al.* (2014).  
906 Characterization of bacterial communities in soil and sediment of a created riverine wetland  
907 complex using high-throughput 16S rRNA amplicon sequencing. *Ecol Eng* 72, 56-66.  
908  
909 Lipson, D.A., Raab, T.K., Parker, M., Kelley, S.T., Brislawn, C.J., and Jansson, J. (2015).  
910 Changes in microbial communities along redox gradients in polygonized Arctic wet tundra soils.  
911 *Env Microbiol Rep* 7(4), 649-657.  
912

- 913 Love, M.I., Huber, W., and Anders, S. (2014). Moderated estimation of fold change and  
914 dispersion for RNA-seq data with DESeq2. *Genome Biol* 15(12), 550.  
915
- 916 Lüdemann, H., Arth, I., and Liesack, W. (2000). Spatial changes in the bacterial community  
917 structure along a vertical oxygen gradient in flooded paddy soil cores. *Appl Environ Microb*  
918 66(2), 754-762.  
919
- 920 McMurdie, P.J., and Holmes, S. (2013) Phyloseq: an R package for reproducible interactive  
921 analysis and graphics of microbiome census data. *PLoS One* 8(4).  
922
- 923 McMurdie, P.J., and Holmes, S. (2014). Waste not, want not: why rarefying microbiome data is  
924 inadmissible. *PLoS Comput Biol*, 10(4), e1003531.  
925
- 926 Morrice, J.A., Danz, N.P., Regal, R.R., Kelly, J.R., Niemi, G.J., Reavie, E.D., *et al.* (2008).  
927 Human influences on water quality in Great Lakes coastal wetlands. *Environ Manage* 41(3), 347-  
928 357.  
929
- 930 Oksanen, J., Kindt, R., Legendre, P., O'Hara, B., Stevens, M.H.H., Oksanen, M.J., and Suggests,  
931 M.A.S.S. (2007). The vegan package. *Community ecology package*, 10, 631-637.  
932
- 933 Peralta, R.M., Ahn, C., and Gillevet, P.M. (2013). Characterization of soil bacterial community  
934 structure and physicochemical properties in created and natural wetlands. *Sci Total Environ* 443,  
935 725-732.  
936
- 937 Quast C., Pruesse E., Yilmaz P., Gerken J., Schweer T., Yarza P., *et al.* (2012). The SILVA  
938 ribosomal RNA gene database project: improved data processing and web-based tools. *Nucleic*  
939 *Acids Res* 41(D1), D590-D596.  
940
- 941 R Core Team (2015) R: A language and environment for statistical computing. Vienna, Austria.  
942 <https://www.R-project.org/>.  
943
- 944 Reddy, K.R., and DeLaune, R.D. (2008). *Biogeochemistry of wetlands: science and applications*.  
945 Boca Raton, FL: CRC Press.  
946
- 947 Schloss, P.D., Westcott, S.L., Ryabin, T., Hall, J.R., Hartmann, M., Hollister, E.B., *et al.* (2009).  
948 Introducing mothur: Open-Source, Platform-Independent, Community-Supported Software for  
949 Describing and Comparing Microbial Communities. *Appl Environ Microbiol* 75(23), 7537-7541.  
950
- 951 Shade, A., Peter, H., Allison, S. D., Baho, D., Berga, M., Bürgmann, H., *et al.* (2012).  
952 Fundamentals of microbial community resistance and resilience. *Front Microbiol* 3, 417.  
953
- 954 Sekiguchi, Y., Yamada, T., Hanada, S., Ohashi, A., Harada, H., and Kamagata, Y. (2003).  
955 *Anaerolinea thermophila* gen. nov., sp. nov. and *Caldilinea aerophila* gen. nov., sp. nov., novel  
956 filamentous thermophiles that represent a previously uncultured lineage of the domain Bacteria  
957 at the subphylum level. *Int J Syst Evol Micr* 53(6), 1843-1851.  
958

- 959 Sierszen, M.E., Morrice, J.A., Trebitz, A.S., and Hoffman, J.C. (2012). A review of selected  
960 ecosystem services provided by coastal wetlands of the Laurentian Great Lakes. *Aquat Ecosyst*  
961 *Health* 15(1), 92-106.  
962
- 963 Sims, A., Zhang, Y., Gajaraj, S., Brown, P.B., and Hu, Z. (2013). Toward the development of  
964 microbial indicators for wetland assessment. *Water Res* 47(5), 1711-1725.  
965
- 966 Tang, Y.S., Wang, L., Jia, J.W., Fu, X.H., Le, Y.Q., Chen, X.Z., and Sun, Y. (2011). Response  
967 of soil microbial community in Jiuduansha wetland to different successional stages and its  
968 implications for soil microbial respiration and carbon turnover. *Soil Biol Biochem* 43(3), 638-  
969 646.  
970
- 971 Trebitz, A.S., Brazner, J.C., Cotter, A.M., Knuth, M.L., Morrice, J.A., Peterson, G.S., *et al.*  
972 (2007). Water quality in Great Lakes coastal wetlands: basin-wide patterns and responses to an  
973 anthropogenic disturbance gradient. *J Great Lakes Res* 33(sp3), 67-85.  
974
- 975 Tulbure, M.G., Johnston, C.A., and Auger, D.L. (2007). Rapid invasion of a Great Lakes coastal  
976 wetland by non-native *Phragmites australis* and *Typha*. *J Great Lakes Res* 33(sp3), 269-279.  
977
- 978 Urakawa, H., and Bernhard, A.E. (2017). Wetland management using microbial indicators. *Ecol*  
979 *Eng* 108(B), 456-476.  
980
- 981 Uzarski, D.G. (2009). Wetlands of Large Lakes. *Encyclopedia of Inland Waters*. Oxford:  
982 Elsevier. p. 599-606.  
983
- 984 Uzarski, D.G., Brady, V.J., Cooper, M.J., Wilcox, D.A., Albert, D.A., Axler, R.P., *et al.* (2017).  
985 Standardized measures of coastal wetland condition: Implementation at a Laurentian Great Lakes  
986 basin-wide scale. *Wetlands* 37(1), 15-32.  
987
- 988 Uzarski, D.G., Burton, T.M., Kolar, R.E., and Cooper, M.J. (2009). The ecological impacts of  
989 fragmentation and vegetation removal in Lake Huron's coastal wetlands. *Aquat Ecosyst Health*  
990 12(1), 45-62.  
991
- 992 Wang, N., and Mitsch, W.J. (1998). Estimating phosphorus retention of existing and restored  
993 coastal wetlands in a tributary watershed of the Laurentian Great Lakes in Michigan, USA. *Wetl*  
994 *Ecol Manag* 6(1), 69-82.  
995
- 996 Yamada, T., Sekiguchi, Y., Hanada, S., Imachi, H., Ohashi, A., Harada, H., and Kamagata, Y.  
997 (2006). *Anaerolinea thermolimosa* sp. nov., *Levilinea saccharolytica* gen. nov., sp. nov. and  
998 *Leptolinea tardivitalis* gen. nov., sp. nov., novel filamentous anaerobes, and description of the  
999 new classes *Anaerolineae* classis nov. and *Caldilineae* classis nov. in the bacterial phylum  
1000 *Chloroflexi*. *Int J Syst Evol Micr* 56(6), 1331-1340.  
1001
- 1002 Yamada, T., Imachi, H., Ohashi, A., Harada, H., Hanada, S., Kamagata, Y., and Sekiguchi, Y.  
1003 (2007). *Bellilinea caldifistulae* gen. nov., sp. nov. and *Longilinea arvoryzae* gen. nov., sp. nov.,

1004 strictly anaerobic, filamentous bacteria of the phylum Chloroflexi isolated from methanogenic  
 1005 propionate-degrading consortia. *Int J Syst Evol Micr* 57(10), 2299-2306.

1006  
 1007 Zhang, B., and Horvath, S. (2005). A general framework for weighted gene co-expression  
 1008 network analysis. *Stat Appl Genet Mol* 4(1).

1009  
 1010

1011 **Tables**

1012

1013 Table 1. Correlations between alpha diversity metrics and measured environmental variables.  
 1014 Asterisks represent significance values where  $p \leq 0.001$  (\*\*\*),  $p \leq 0.01$  (\*\*), and  $p \leq 0.05$  (\*).

1015

|                              | Chao1   | Shannon |
|------------------------------|---------|---------|
| P                            | 0.31**  | -0.09   |
| S                            | 0.42*** | 0.45*** |
| NO <sub>3</sub> <sup>-</sup> | 0.42*** | 0.24*   |
| C:N                          | -0.03   | -0.2    |
| NUTR                         | 0.24*   | 0.41*** |

1016

1017 Table 2. Pairwise perMANOVA results comparing pairwise differences between wetland regions  
 1018 and differences between wetland soil depths. Values represent significant ( $p \leq 0.01$ ) R<sup>2</sup> results,  
 1019 and *n.s.* represents lack of significance ( $p > 0.01$ ).

1020

| Region | BA          | ESBT        | LE     | NSB         | WSB |
|--------|-------------|-------------|--------|-------------|-----|
| BA     | -           |             |        |             |     |
| ESBT   | <i>n.s.</i> | -           |        |             |     |
| LE     | 0.507       | 0.401       | -      |             |     |
| NSB    | <i>n.s.</i> | <i>n.s.</i> | 0.524  | -           |     |
| WSB    | <i>n.s.</i> | <i>n.s.</i> | 0.435  | <i>n.s.</i> | -   |
| Depth  | Top         | Middle      | Bottom |             |     |
| Top    | -           |             |        |             |     |
| Middle | **          | -           |        |             |     |
| Bottom | **          | <i>n.s.</i> | -      |             |     |

1021

1022



1023 **Figure Legends**

1024

1025 Figure 1. Geographic map displaying locations of sites sampled within this study. Colors of  
1026 points correspond to region sampled.

1027

1028 Figure 2. Principal Component Analysis (PCA) illustrating separation of samples based upon soil  
1029 geochemistry. Shapes and colors correspond to different wetland depths and regions,  
1030 respectively, as listed in the legend. Percentages on axes represent explained variance of that  
1031 principal component. Vectors represent impact of specific environmental variables on sample  
1032 distribution. NUTR represents OM values, which correlated significantly ( $p \leq .01$ ,  $r > 0.56$ ) to  
1033  $\text{NO}_3^-$ , OC, OM, S, and TN. Ellipses represent 95% confidence intervals of regional groupings.

1034

1035 Figure 3. Boxplot diagram comparing Chao1 diversity among wetland regions. Boxes with the  
1036 same letter are not significantly different, while those with no common letters are significantly  
1037 different ( $p \leq 0.01$ ). Lines within boxes represent the median, hinges represent  $\pm 25\%$  quartiles,  
1038 whiskers represent up to 1.5x the interquartile range. Colors represent wetland region.

1039

1040 Figure 4. Nonmetric Multidimensional Scaling (NMDS) plot illustrating separation of samples  
1041 based upon differences in microbial community structure. Shapes and colors correspond to  
1042 different depths and wetland regions, respectively, as listed in the legend. Vectors represent  
1043 correlations of environmental variables to the distribution of the microbial communities  
1044 represented in the plot.

1045

1046 Figure 5. NMDS plots of each wetland region demonstrating separation of samples based upon  
1047 differences in microbial community structure, including (A) BA, (B) ESBT, (C) LE, (D) NSB,  
1048 and (E) WSB. Shapes and colors correspond to different depths and wetland sites, respectively,  
1049 as listed in the legends. Vectors represent correlations of environmental variables to the  
1050 distribution of microbial communities represented in the plots.

1051

1052 Figure 6. Differential analysis results comparing differentially abundant OTUs between the LE  
1053 region and all other wetland regions (i.e., BA, ESBT, NSB, WSB). Points represent individual  
1054 OTUs, and OTU placement above or below the “0” line represents an OTU’s corresponding  
1055 logarithmic fold change at  $\log_2$ . OTUs below the “0” line represent OTUs which were more  
1056 relatively abundant within the LE region, and OTUs above the “0” line represent OTUs which  
1057 were more relatively abundant within other wetland regions. Color of point represents phylum  
1058 identity, and columns represent the Class to which an OTU was confidently assigned (bootstrap  
1059 value of 100).

1060

1061 Figure 7. Differential analysis results comparing differentially abundant OTUs between the top  
1062 and bottom wetland soil zones. Points represent individual OTUs, and OTU placement above or  
1063 below the “0” line represents an OTU’s corresponding logarithmic fold change at  $\log_2$ . OTUs  
1064 below the “0” line represent OTUs which were more relatively abundant within the top soil layer  
1065 (0 – 2 cm), and OTUs above the “0” line represent OTUs which were more relatively abundant  
1066 within the bottom soil layer (4 – 6 cm). Color of point represents phylum identity, and columns  
1067 represent the Class to which an OTU was confidently assigned (bootstrap value of 100).

1068

1069 Figure 8. Network visualization and results of partial least squares analysis on the subnetwork  
1070 most correlated with NUTR. The y-axis represents correlation of OTU to OC values, whereas the  
1071 x-axis represents the node centrality. Points represent OTUs, and the color of points corresponds  
1072 to the phylum to which an OTU belongs. Point size corresponds to VIP score of that OTU. The  
1073 top 15 OTUs are labeled within the graph with corresponding lowest taxonomic identification  
1074 possible, and the level of that classification. D = Domain; P = Phylum, C = Class, O = Order, F =  
1075 Family, G = Genus.  
1076

1077 Figure 9. Network visualization and results of partial least squares analysis on the subnetwork  
1078 most correlated with C:N. The y-axis represents correlation of OTU to C:N, whereas the x-axis  
1079 represents the node centrality. Points represent OTUs, and the color of points corresponds to the  
1080 phylum to which an OTU belongs. Point size corresponds to VIP score of that OTU. Only OTUs  
1081 with a VIP score > 1 were displayed for visualization purposes. The top 15 OTUs are labeled  
1082 within the graph with corresponding lowest taxonomic identification possible, and the level of  
1083 that classification. D = Domain; P = Phylum, C = Class, O = Order, F = Family, G = Genus.  
1084

1085

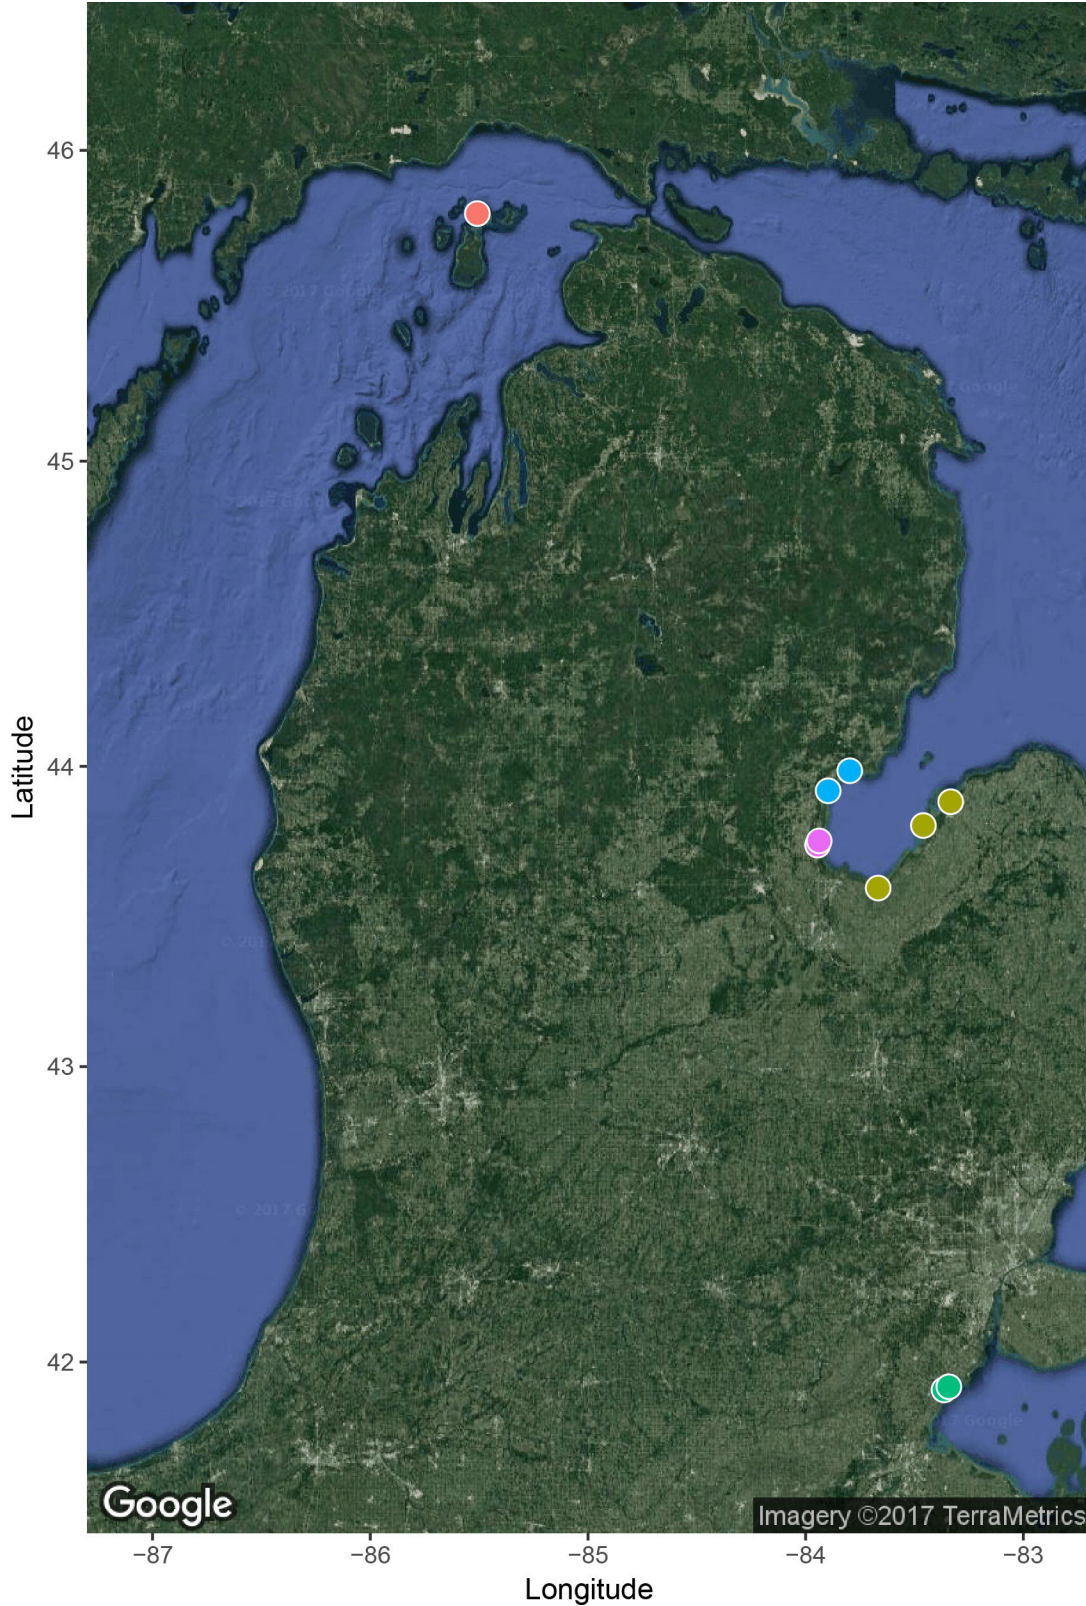

### Region

- BA
- ESBT
- LE
- NSB
- WSB

Google

Imagery ©2017 TerraMetrics

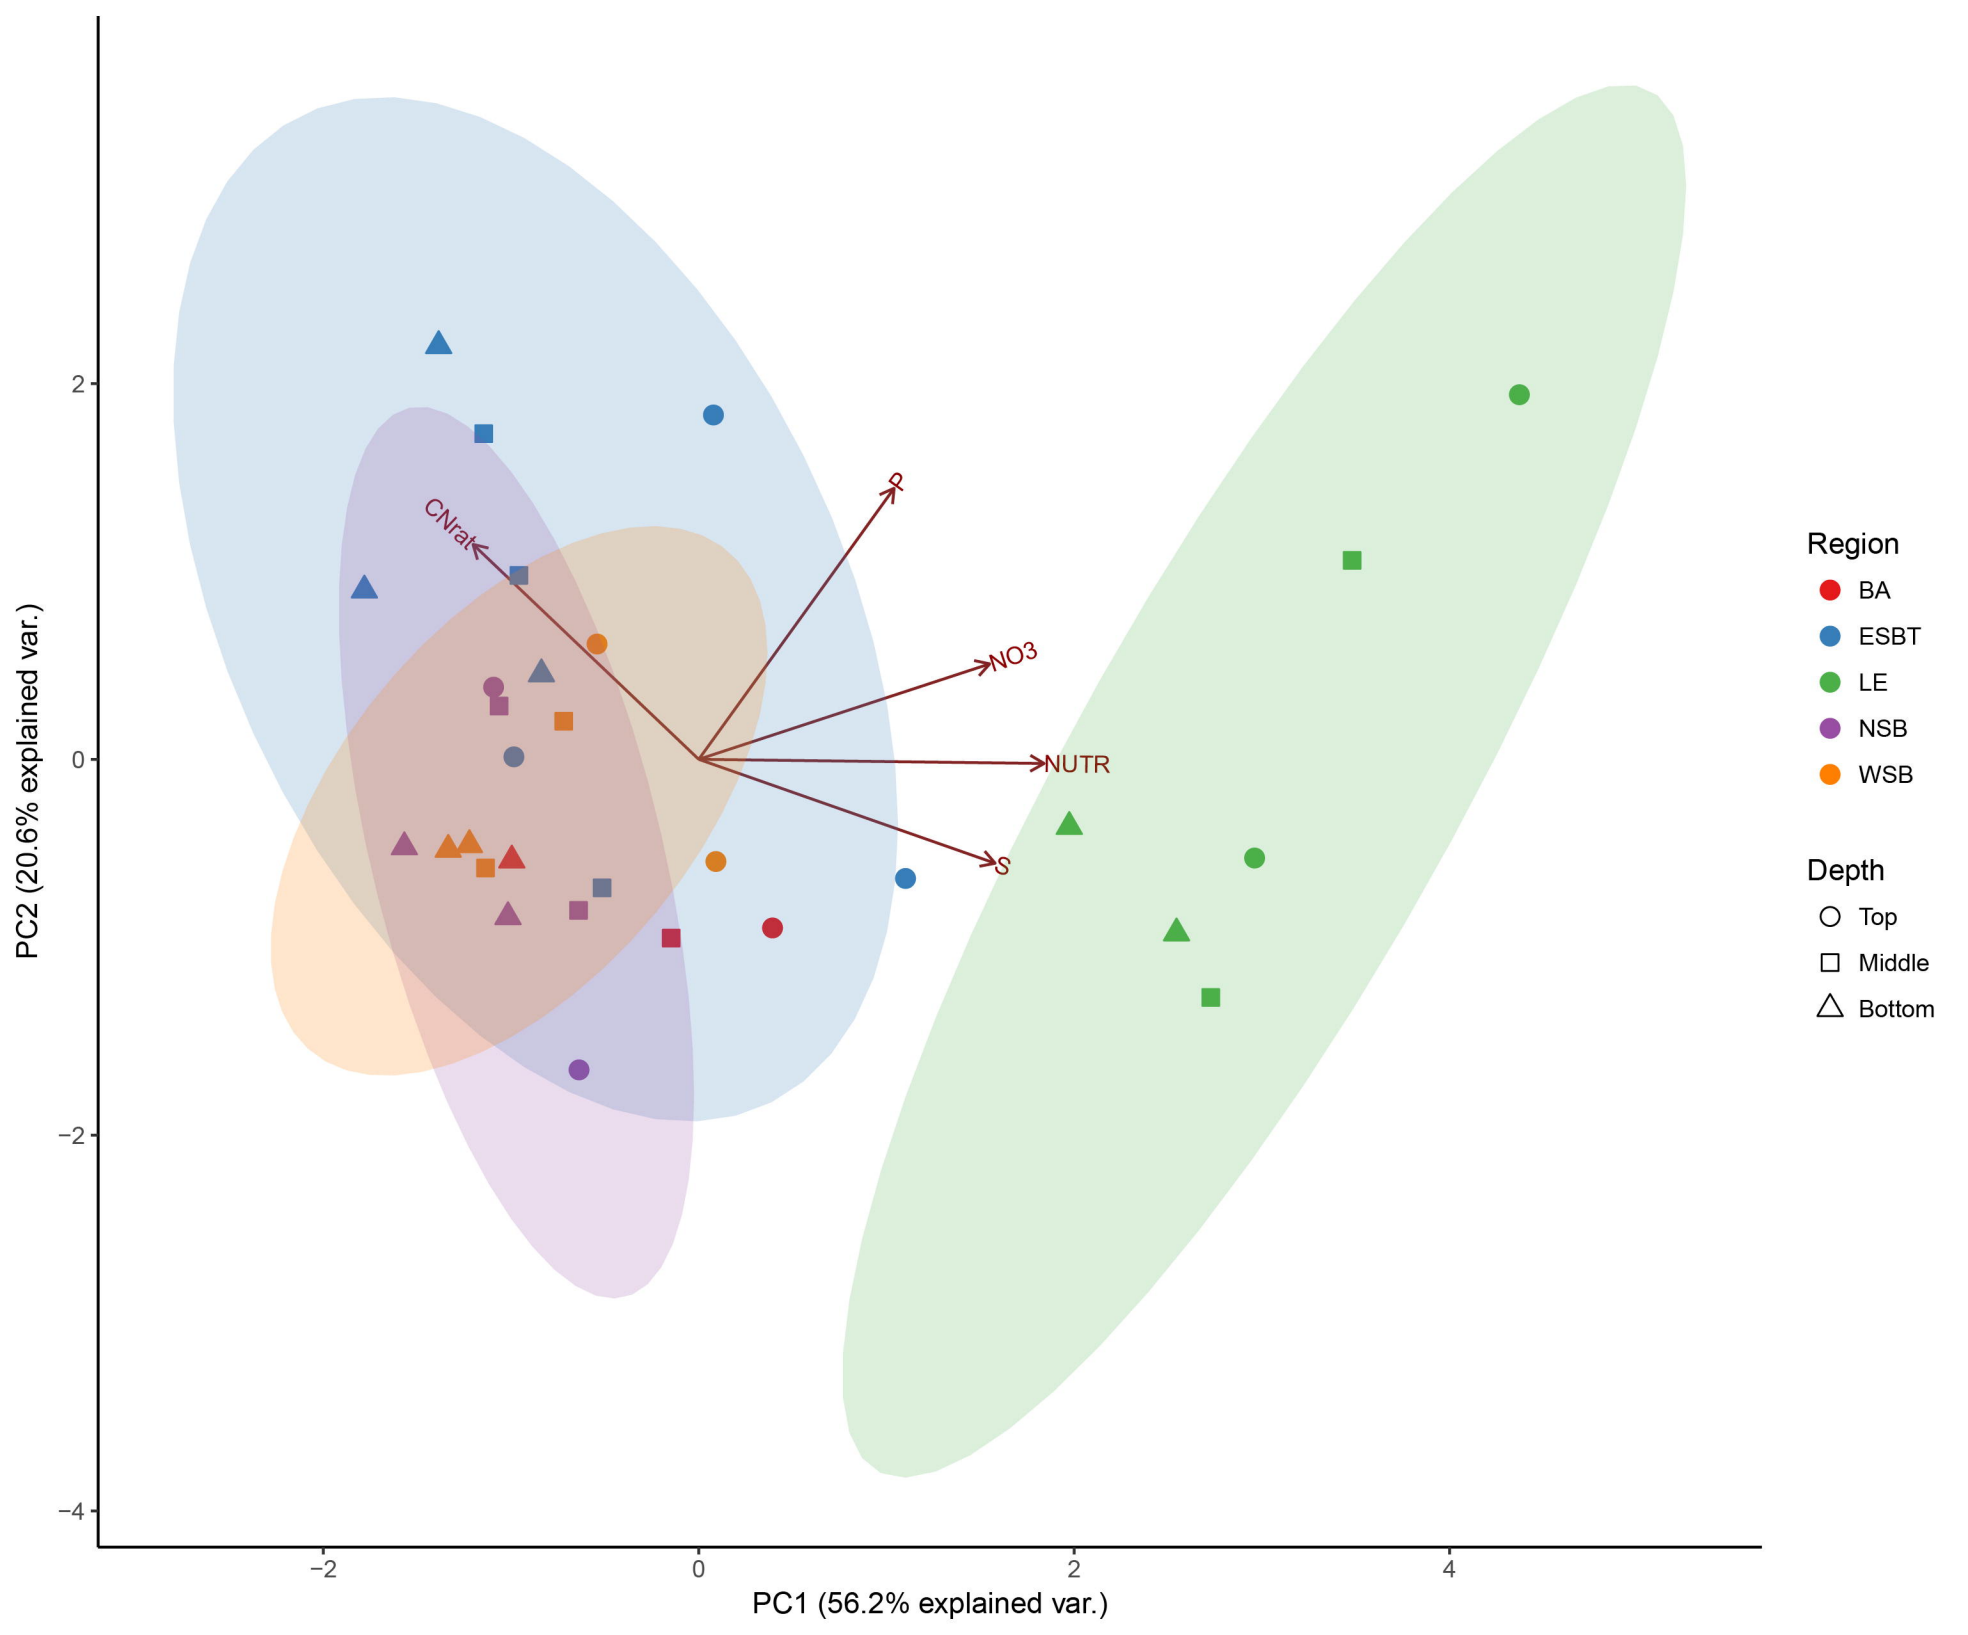

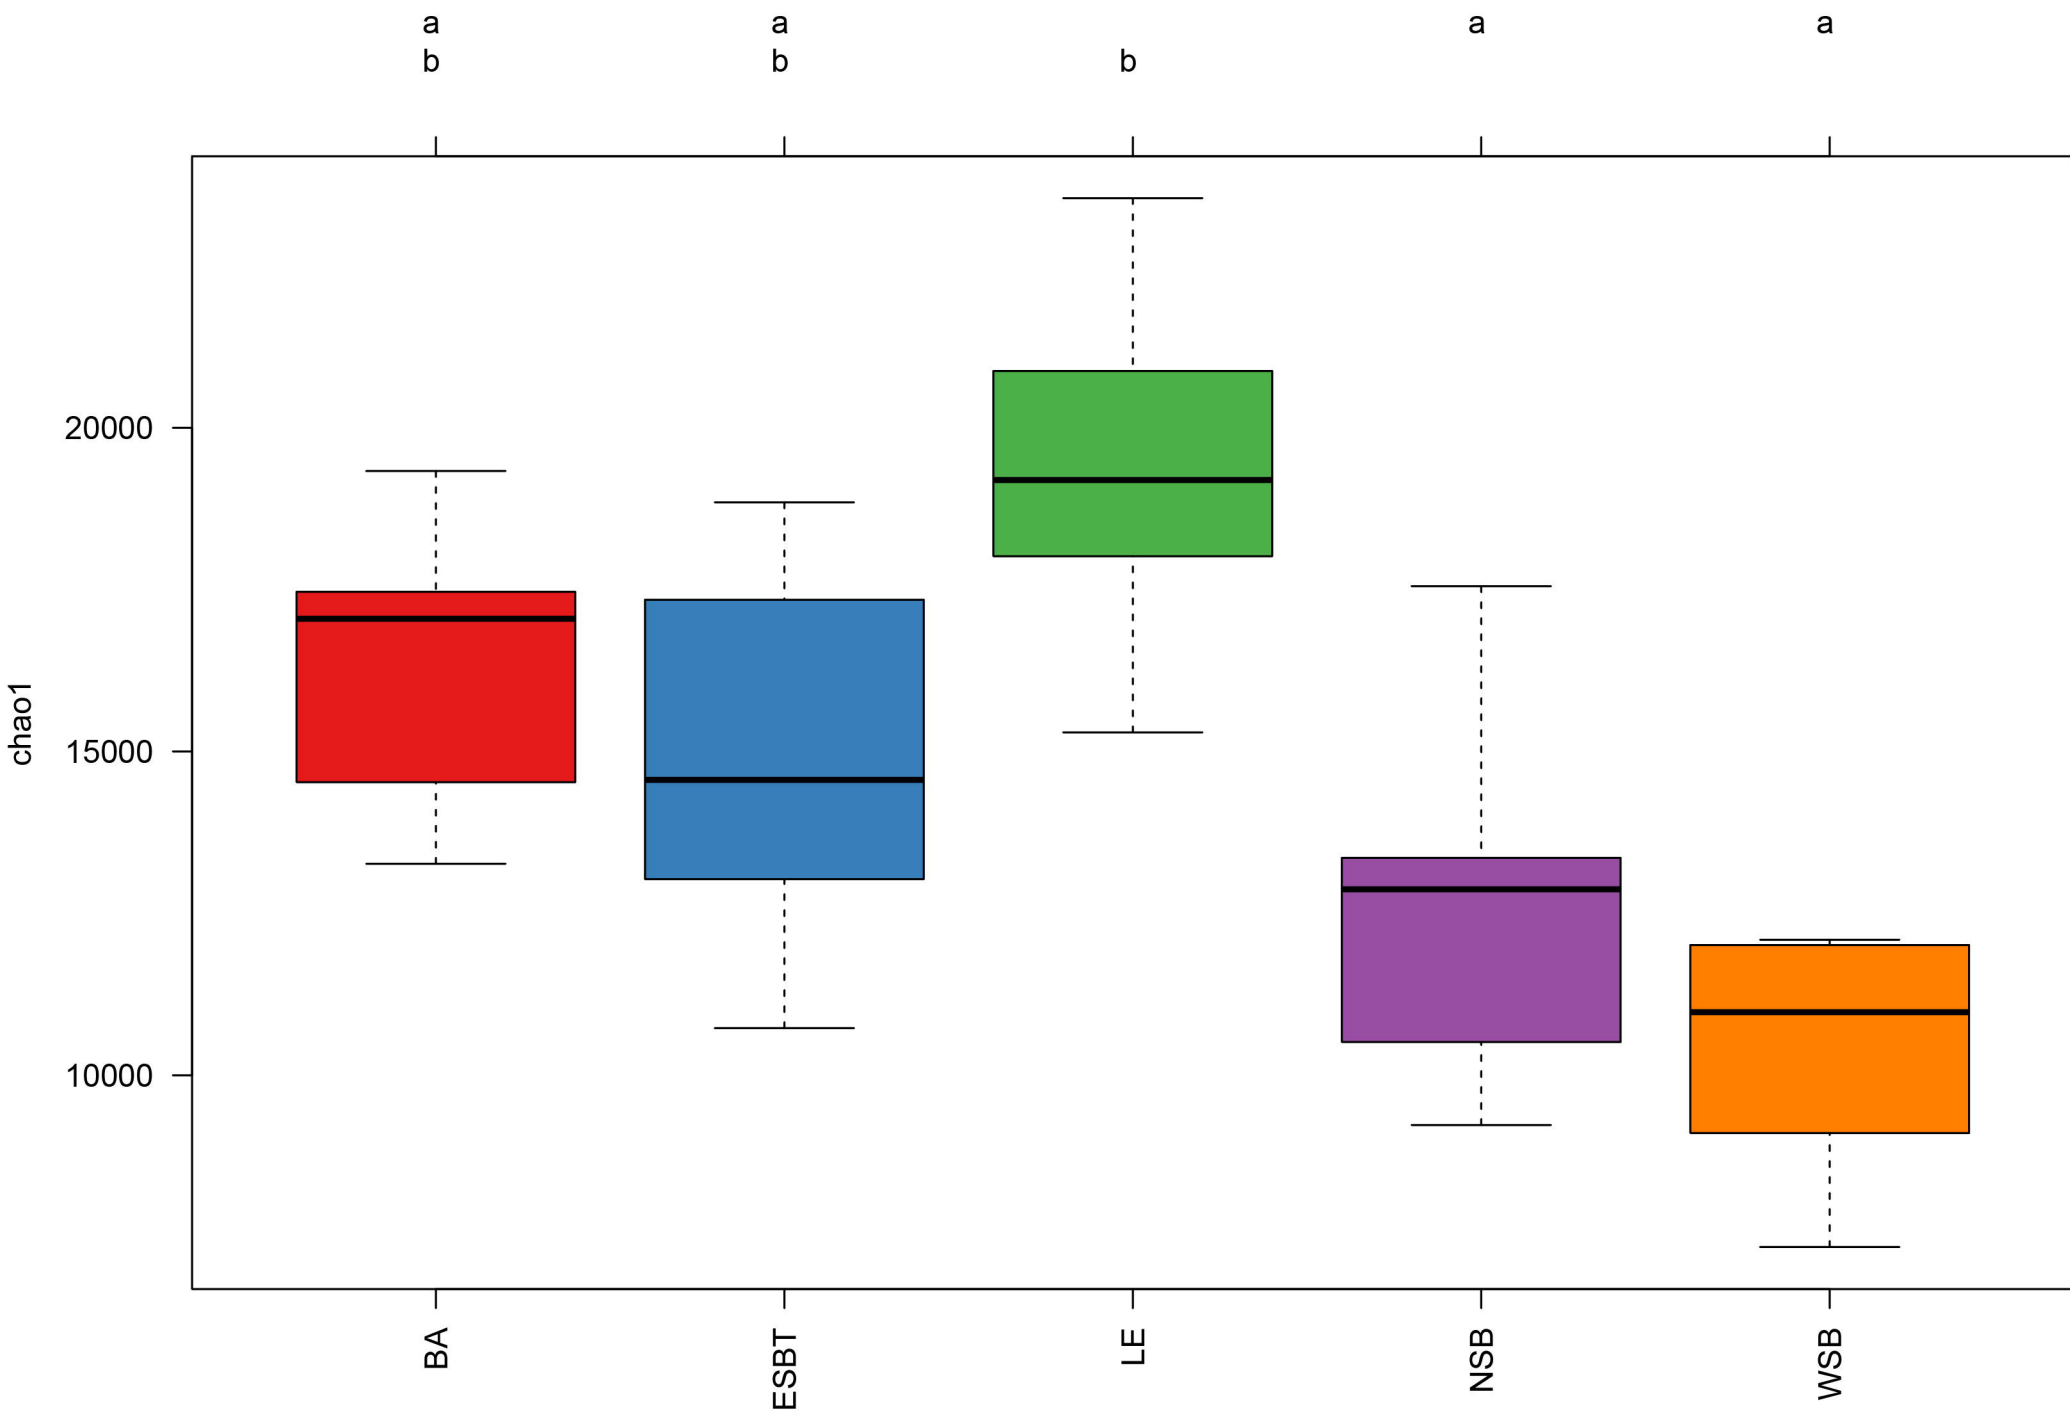



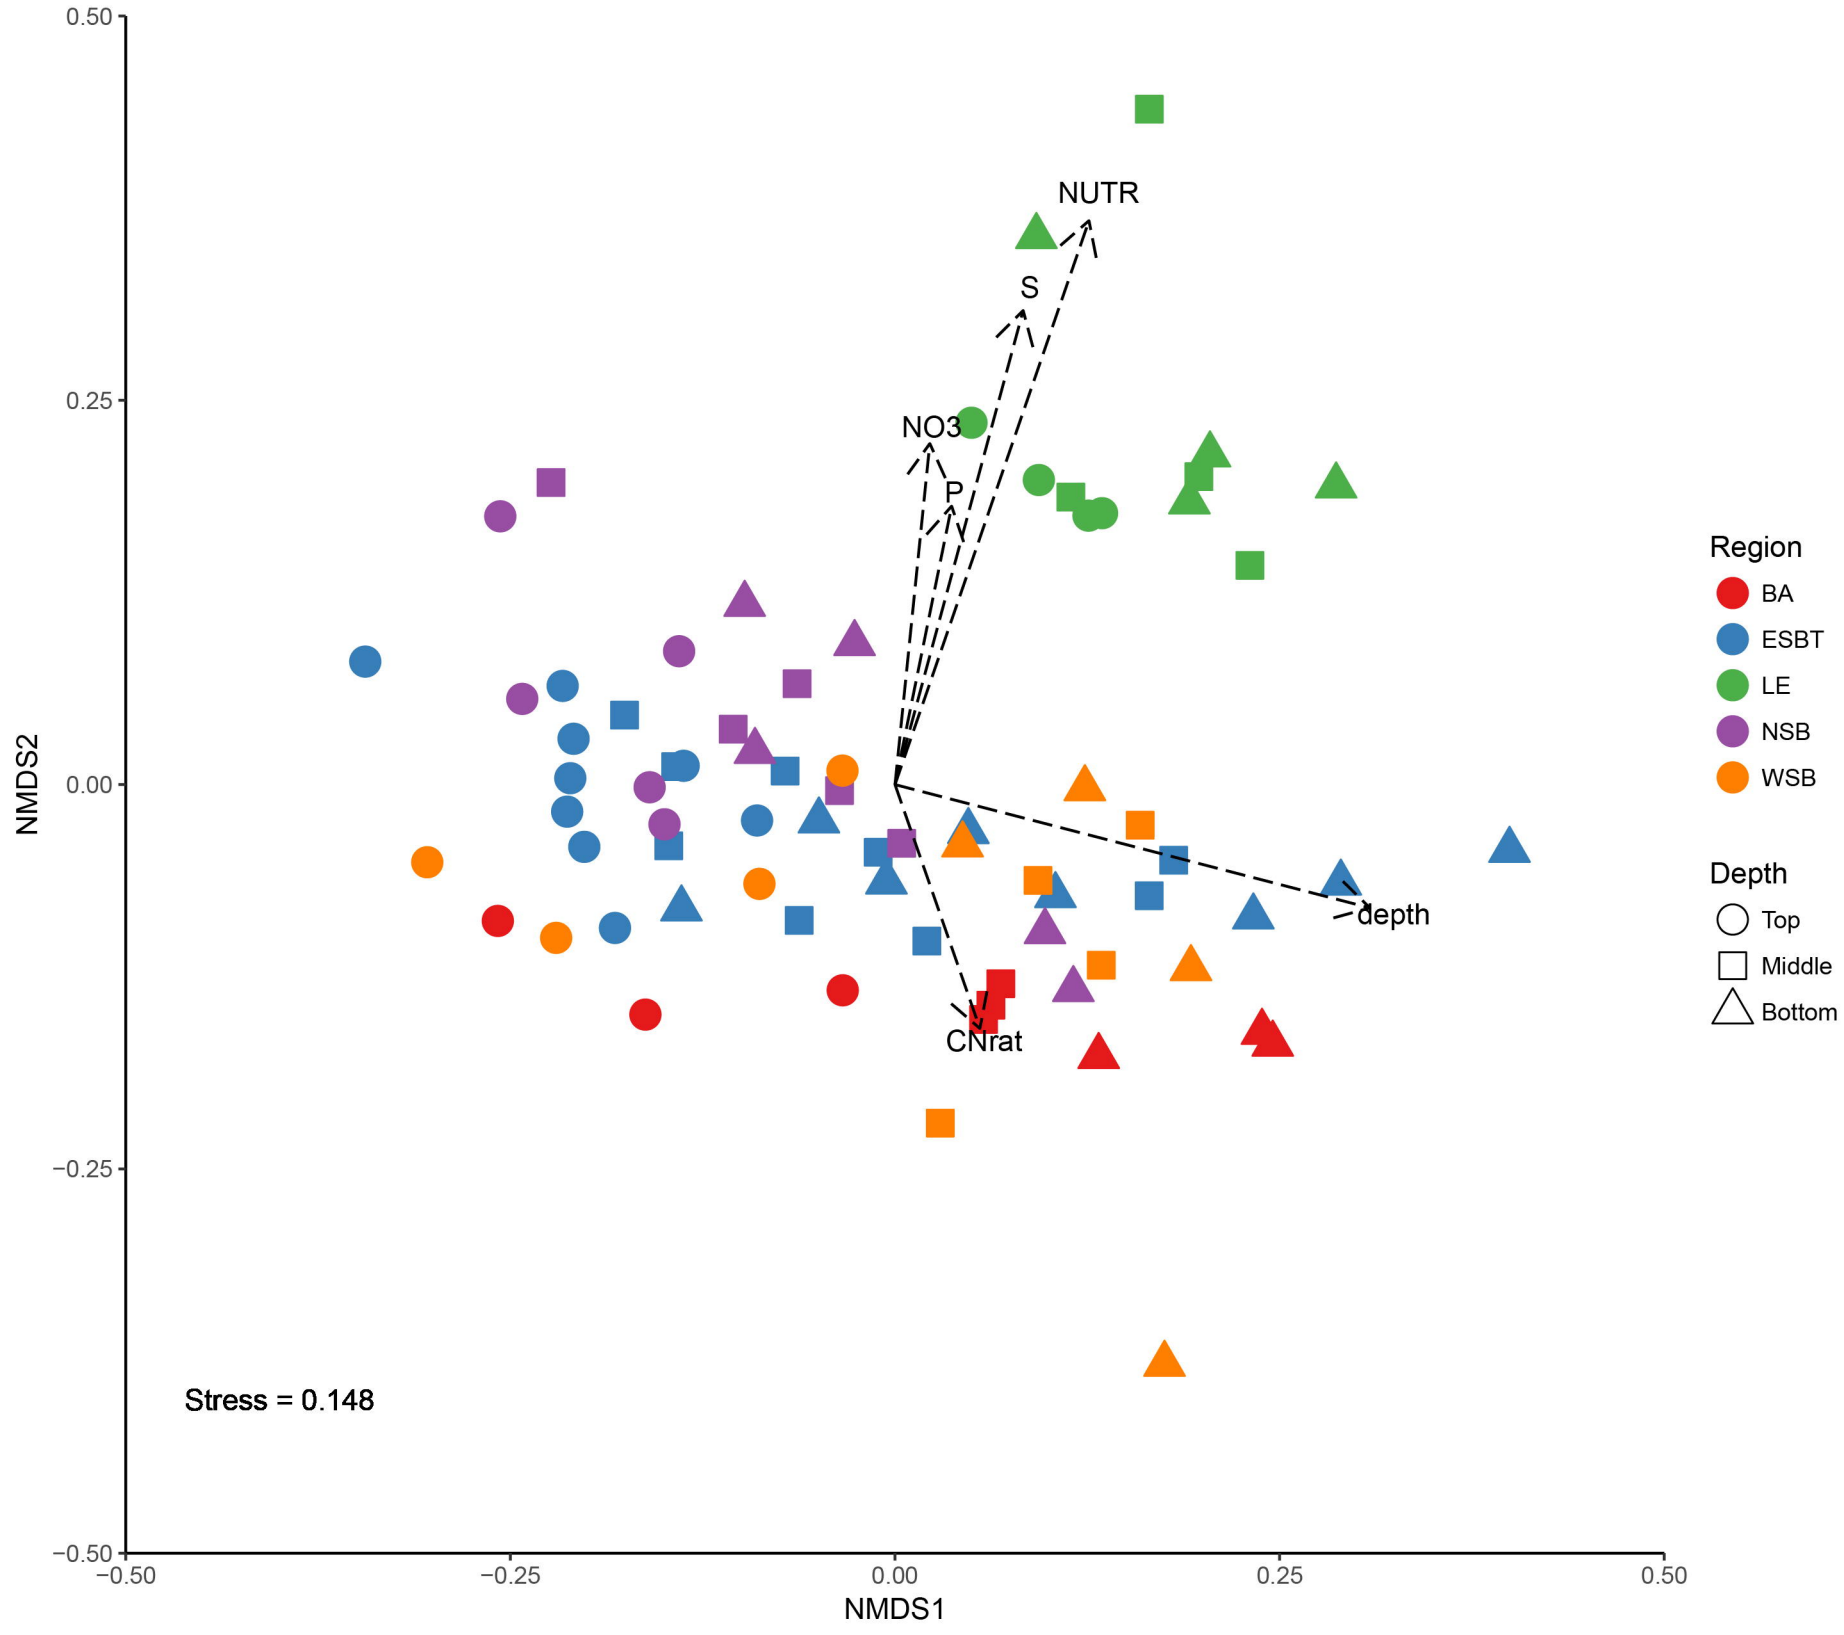

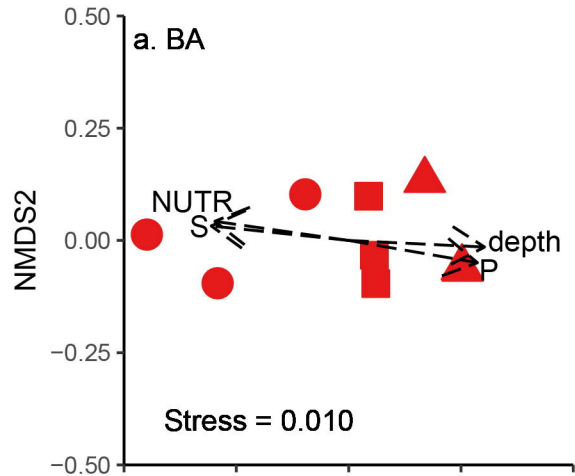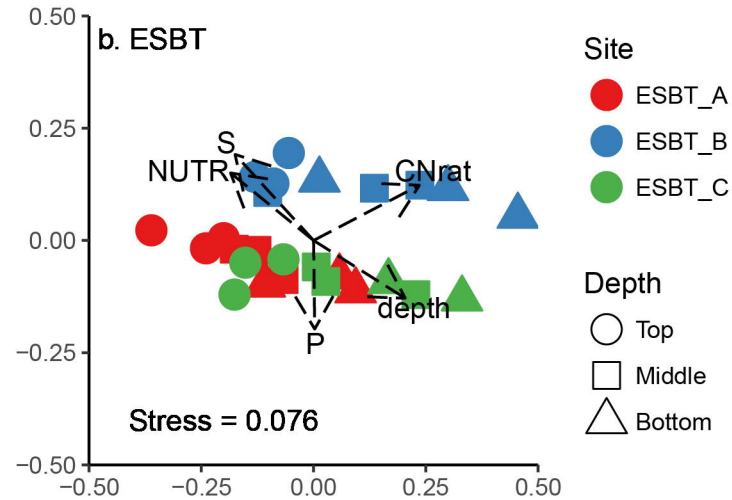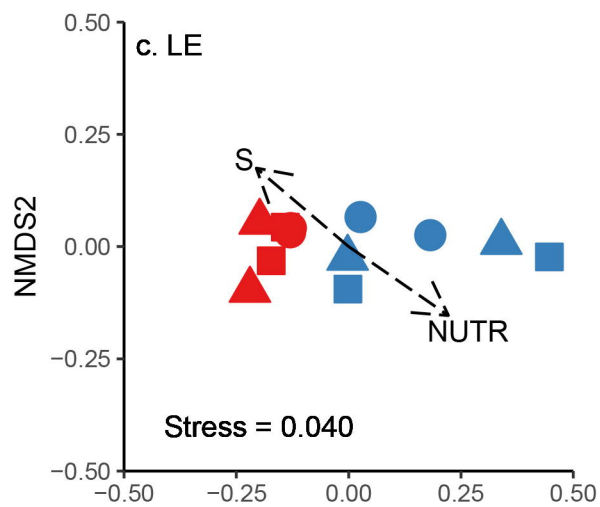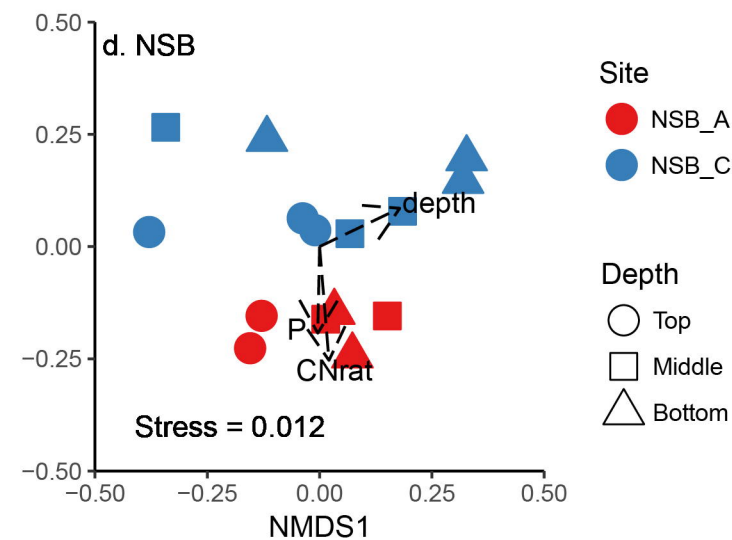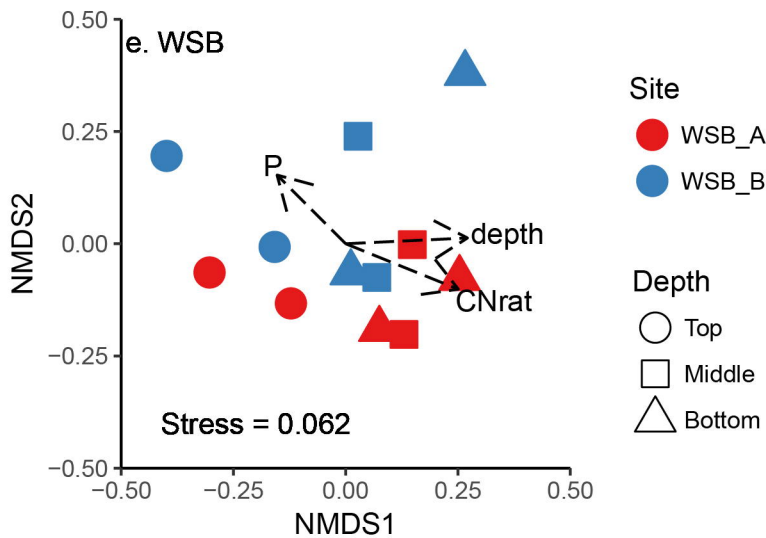

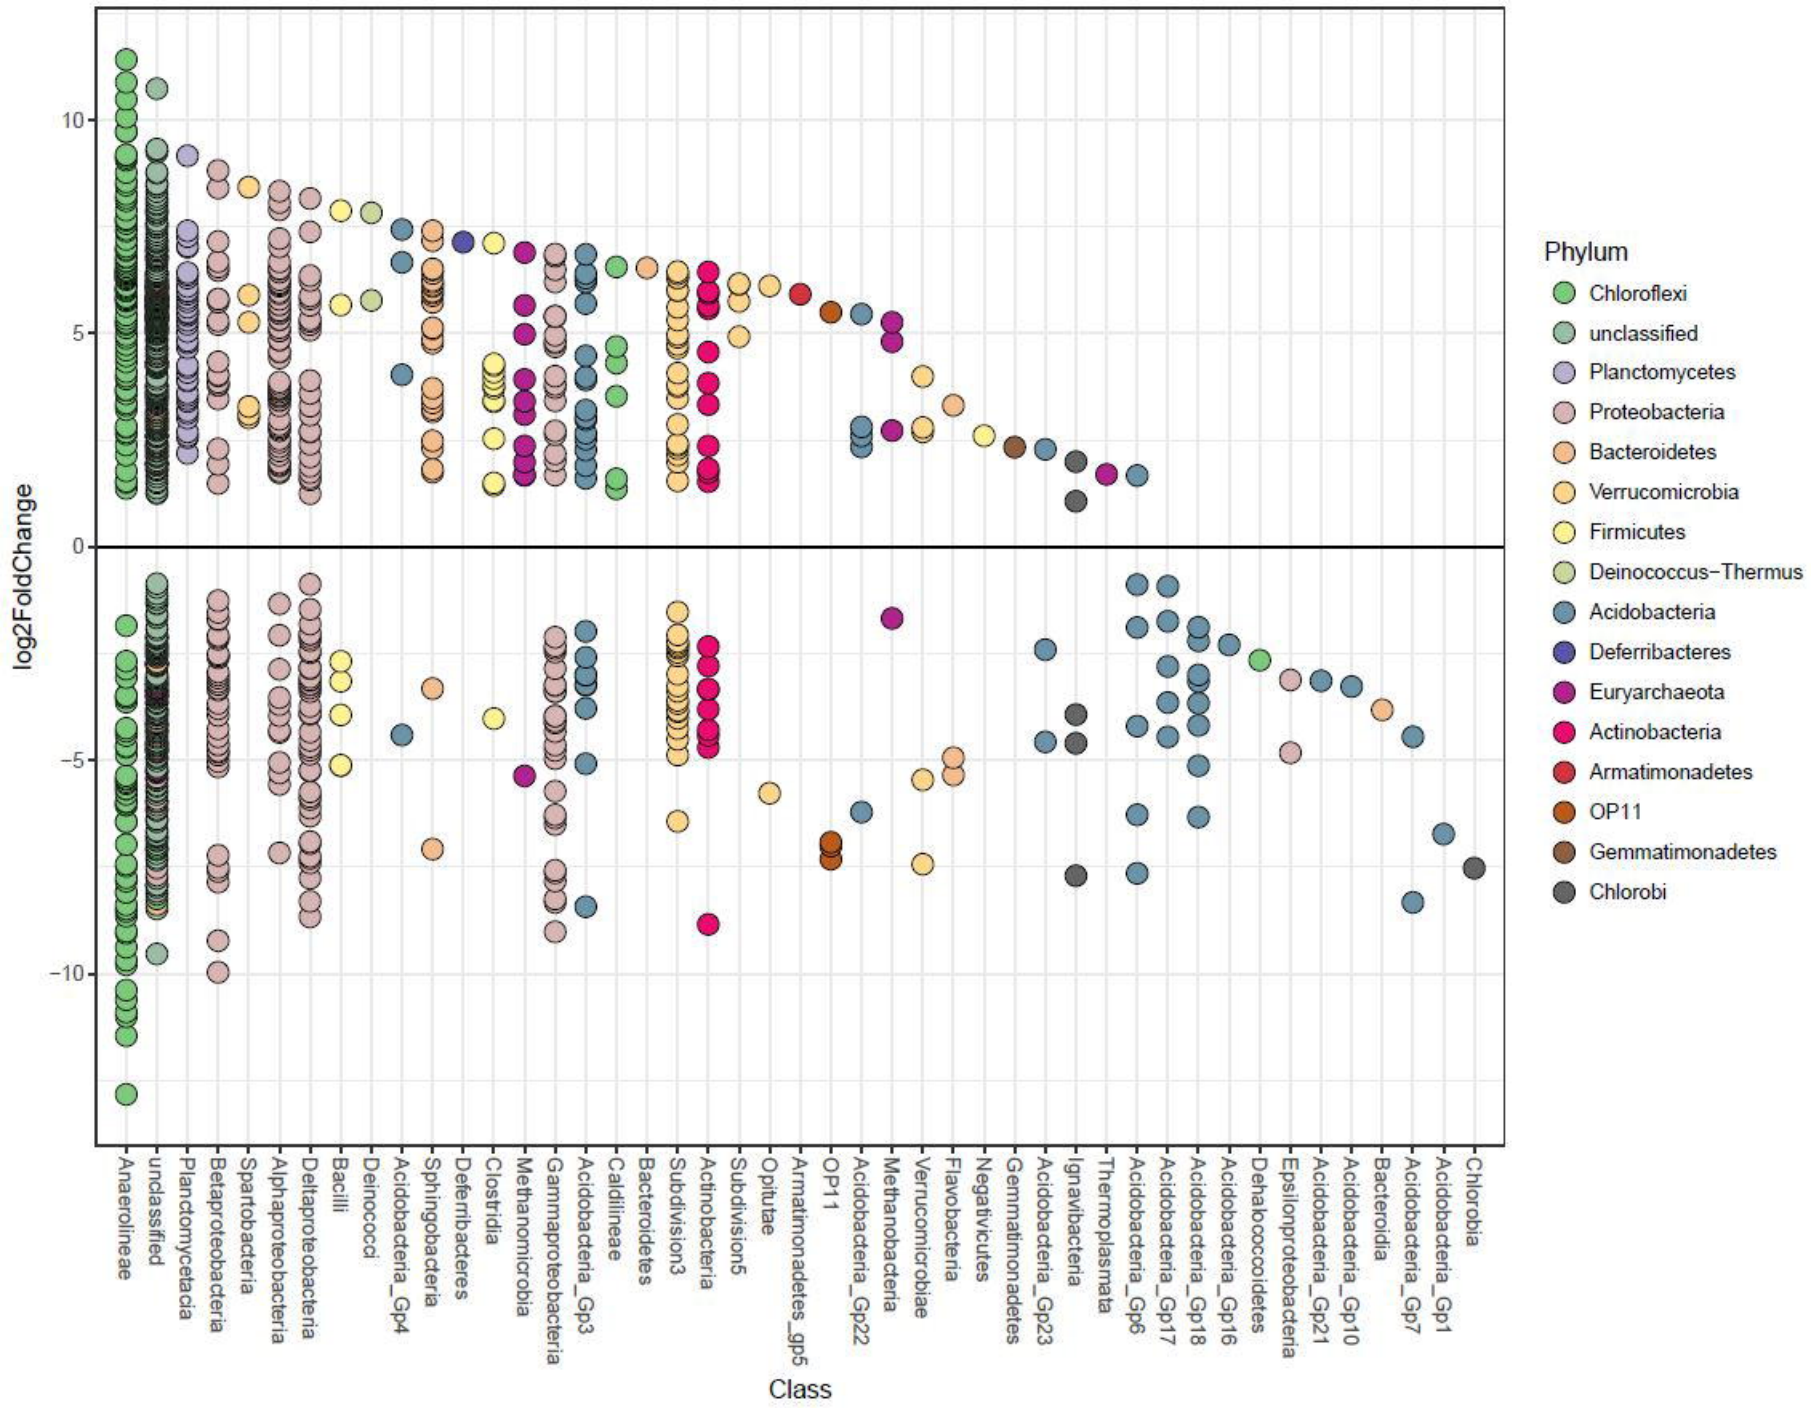

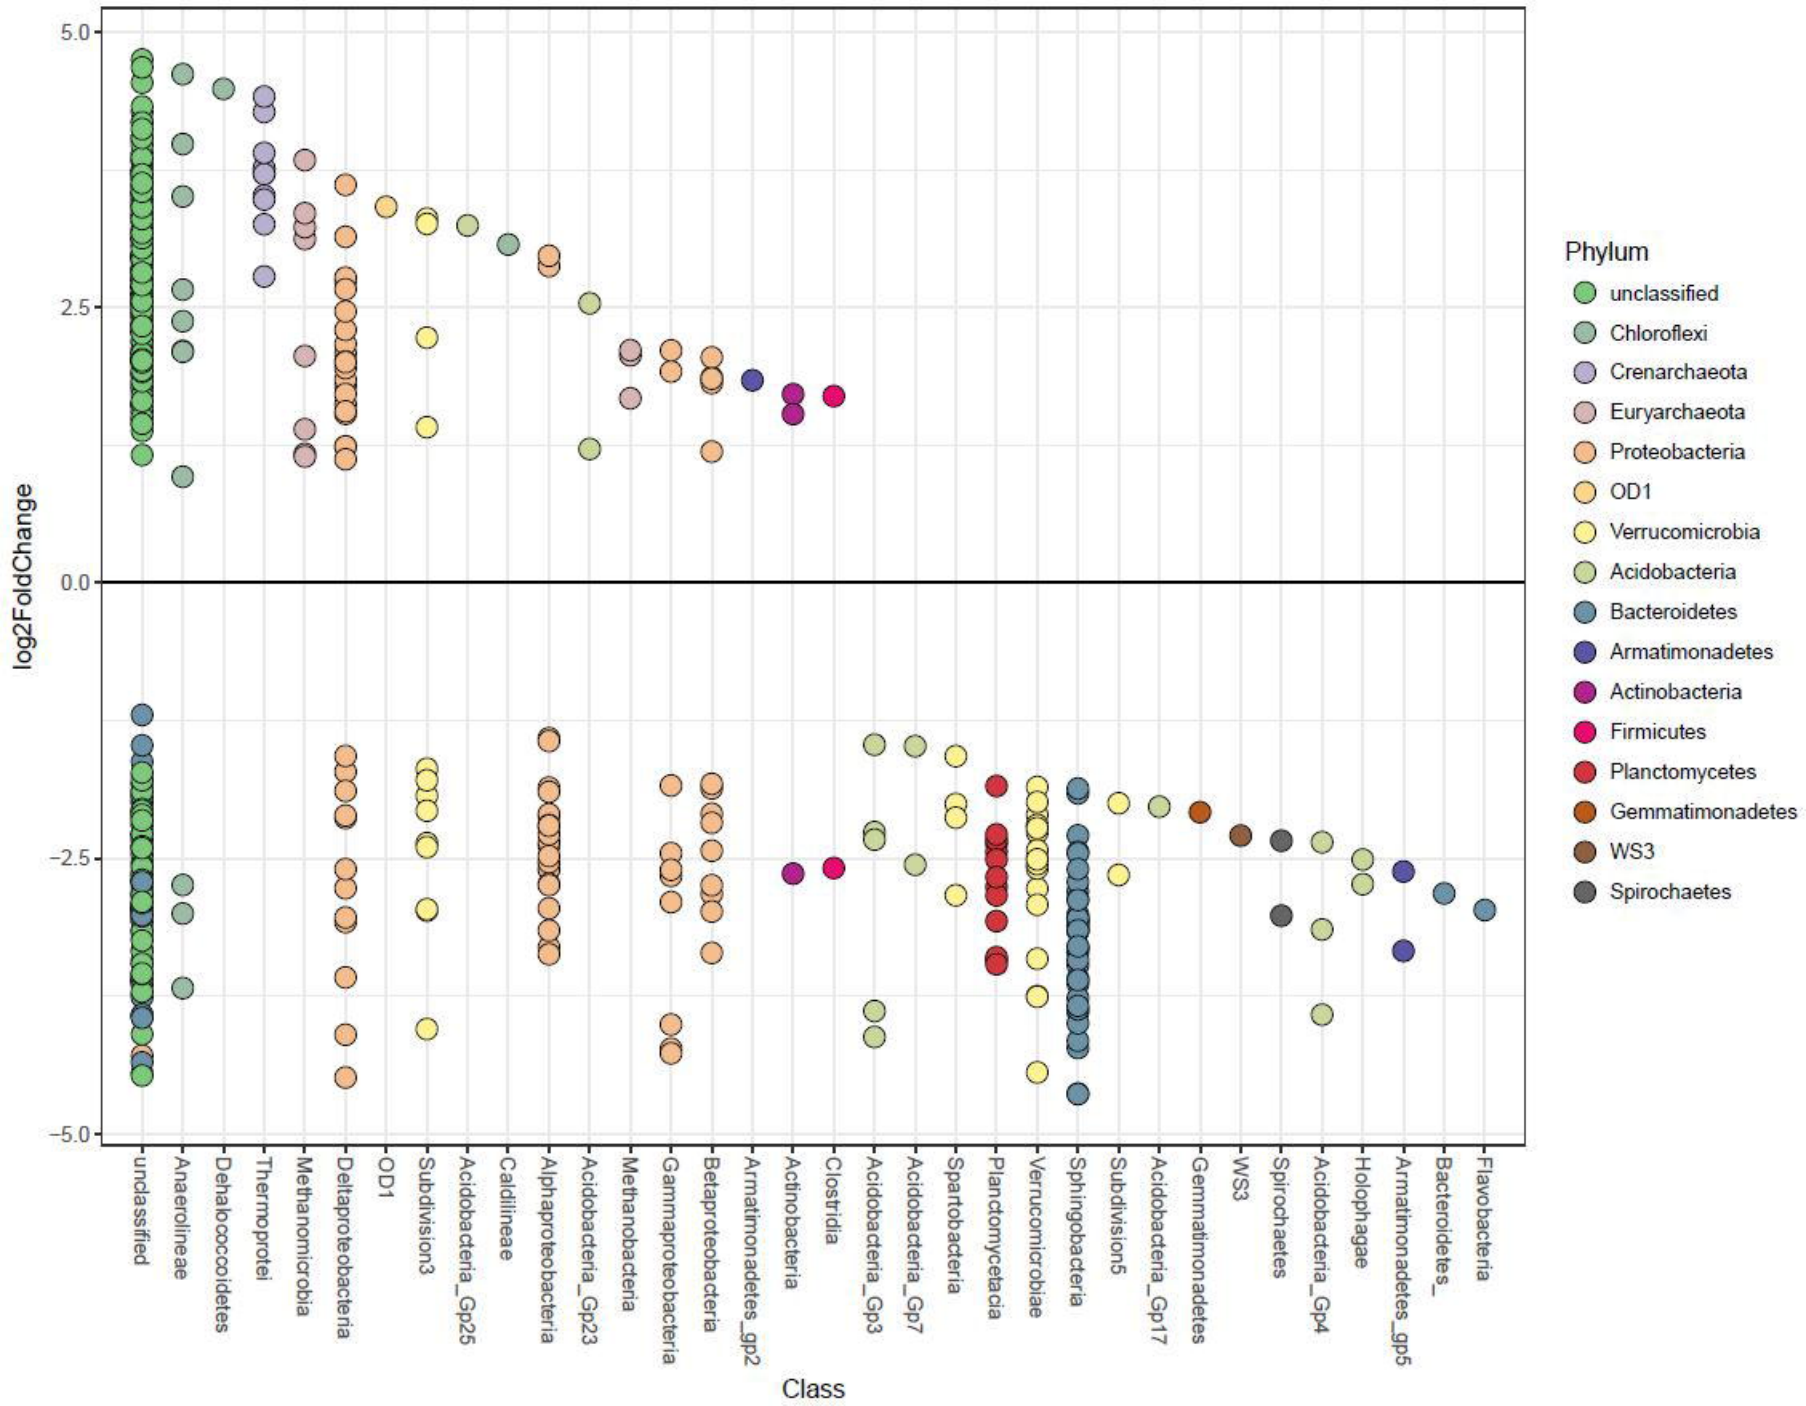





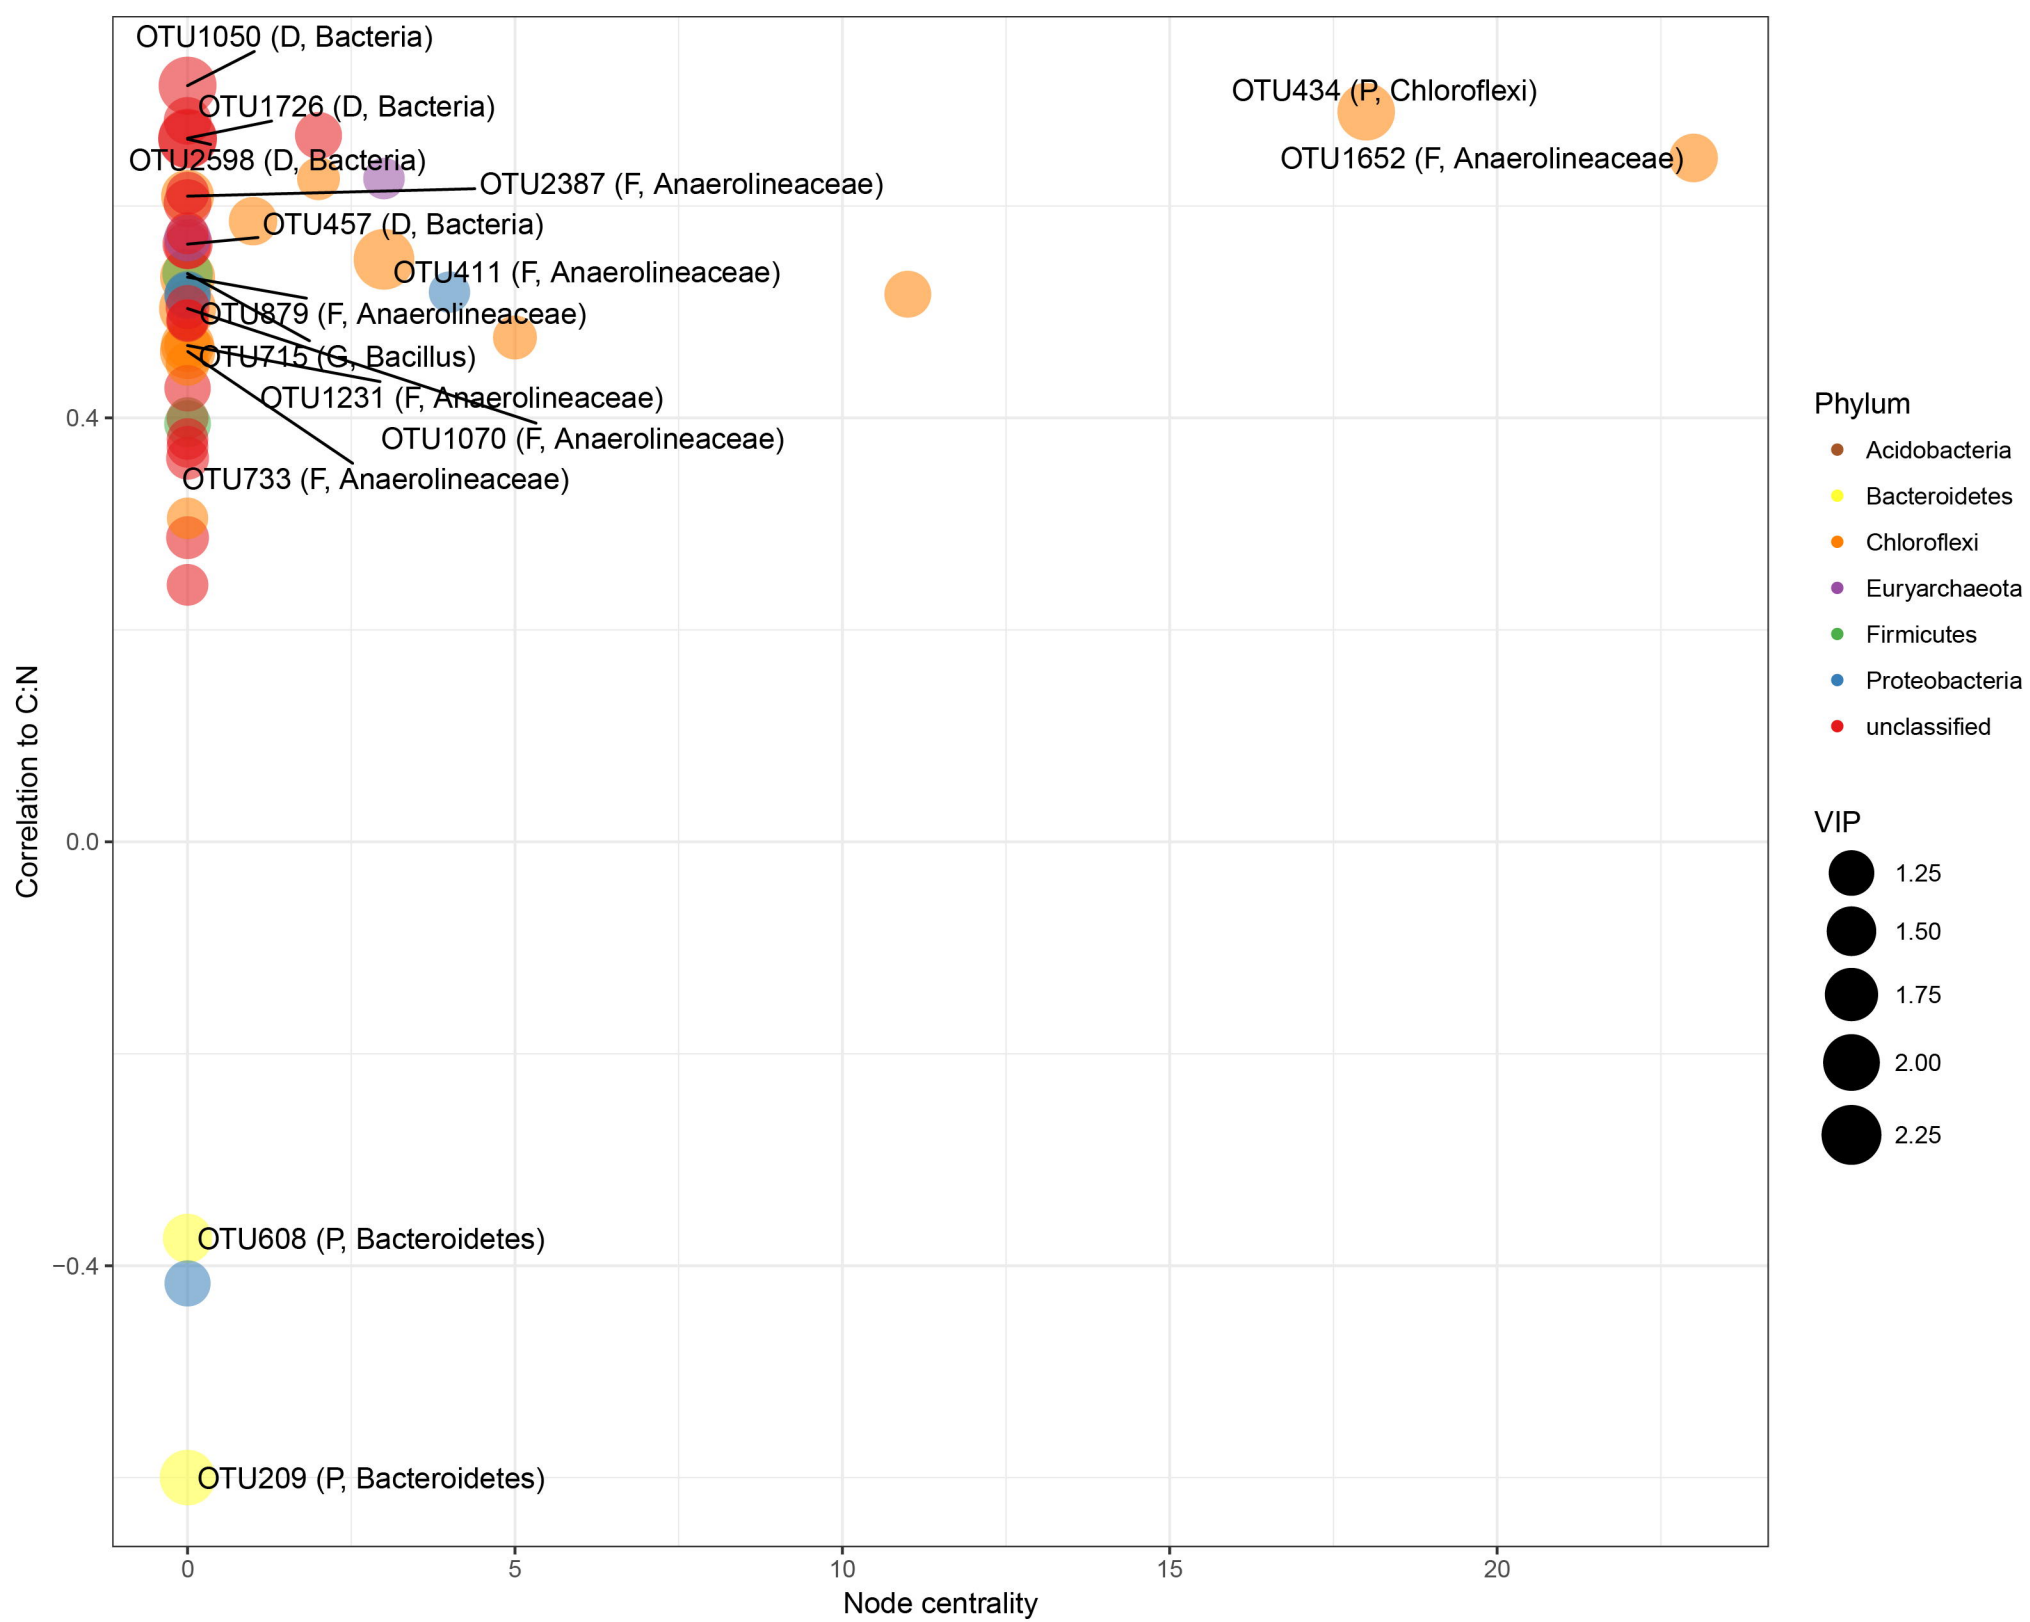

Source: http://biorxiv.org/content/10.1101/217919v3.full.pdf
